# Supplementary material for: Comparing the Diagnostic Performance of QuantiFERON-TB Gold Plus with QFT-GIT, T-SPOT.TB and TST: A Systematic Review and Meta-analysis
Source: Research Square preprint supplement (doi:10.21203/rs.3.rs-2045745/v1), 2022-09-19

## Supplementary Material

|                                                                                                                                                                                                          |    |
|----------------------------------------------------------------------------------------------------------------------------------------------------------------------------------------------------------|----|
| Supplementary Table 1: PRISMA checklist .....                                                                                                                                                            | 3  |
| Supplementary Table 2: Search strategy .....                                                                                                                                                             | 6  |
| Supplementary Table 3: Inclusion and partial exclusion for patients with active TB.....                                                                                                                  | 8  |
| Supplementary Table 4: Inclusion and partial exclusion for populations with very low risk of TB exposure .....                                                                                           | 8  |
| Supplementary Table 5: Inclusion and partial exclusion for high-risk populations.....                                                                                                                    | 8  |
| Supplementary Table 6: Populations considered high-risk.....                                                                                                                                             | 9  |
| Supplementary Table 7: Details of excluded criteria .....                                                                                                                                                | 9  |
| Supplementary Table 8: QUADAS-2 adapted quality assessment criteria for patients with active TB .....                                                                                                    | 10 |
| Supplementary Table 9: Quality score of 12 studies for patients with active TB.....                                                                                                                      | 11 |
| Supplementary Table 10: QUADAS-2 adapted quality assessment criteria for populations with very low risk of TB exposure.....                                                                              | 12 |
| Supplementary Table 11: Quality score of 7 studies for populations with very low risk of TB exposure .....                                                                                               | 13 |
| Supplementary Table 12: QUADAS-2 adapted quality assessment criteria for high-risk groups.....                                                                                                           | 14 |
| Supplementary Table 13: Quality score of 31 studies for high-risk groups.....                                                                                                                            | 15 |
| Supplementary Table 14: Reasons for exclusion of 42 studies that were read in full-text review .....                                                                                                     | 17 |
| Supplementary Table 15: Characteristics of the 12 studies included in the sensitivity analysis .....                                                                                                     | 23 |
| Supplementary Table 16: Characteristics of the 7 studies included in the specificity analysis .....                                                                                                      | 24 |
| Supplementary Table 17: Characteristics of the 31 studies included in the positive rates.....                                                                                                            | 25 |
| Supplementary Table 18: Linear regression test of funnel plot asymmetry results of QFT-PLUS QFT-PLUS compared to QFT-GIT, T-SPOT.TB and TST in in three populations.....                                 | 27 |
| <br>                                                                                                                                                                                                     |    |
| Figure 1: Forest plot of studies estimating the sensitivity of QFT-Plus (A) and QFT-GIT (B) in patients with active tuberculosis .....                                                                   | 28 |
| Figure 2: Forest plot of studies estimating the sensitivity of QFT-Plus (A) and T-SPOT.TB (B) in patients with active tuberculosis .....                                                                 | 29 |
| Figure 3: Forest plot of studies estimating the specificity of QFT-Plus (A) and QFT-GIT (B) in populations with very low risk of TB exposure.....                                                        | 30 |
| Figure 4: Forest plot of studies estimating the specificity of QFT-Plus (A) and T-SPOT.TB (B) in populations with very low risk of TB exposure. ....                                                     | 31 |
| Figure 5: Forest plot of studies estimating the specificity of QFT-Plus (A) and TST (B) in populations with very low risk of TB exposure. ....                                                           | 32 |
| Figure 6: Forest plot of studies estimating the positive rate Plus (A) and QFT-GIT (B) in high-risk populations. ....                                                                                    | 33 |
| Figure 7: Forest plot of studies estimating the positive rate of QFT-Plus (A) and T-SPOT.TB (B) in high-risk populations. ....                                                                           | 34 |
| Figure 8: Forest plot of studies estimating the positive rate of QFT-Plus (A) and TST (B) in high-risk populations.....                                                                                  | 35 |
| Figure 9: Forest plot of studies estimating the sensitivity in patients with active tuberculosis for age (A), TB burden (B) and participant (C) subgroup analysis of QFT-PLUS compared with QFT-GIT..... | 36 |

|                                                                                                                                                                                                                  |    |
|------------------------------------------------------------------------------------------------------------------------------------------------------------------------------------------------------------------|----|
| Figure 10: Forest plot of studies estimating the sensitivity in patients with active tuberculosis for participant subgroup analysis of QFT-PLUS compared with T-SPOT.TB.....                                     | 38 |
| Figure 11: Forest plot of studies estimating the Specificity in populations with very low risk of TB exposure for TB burden (A) and participant (B) subgroup analysis of QFT-PLUS compared with QFT-GIT.....     | 39 |
| Figure 12: Forest plot of studies estimating the positive rate in high-risk populations for age (A), TB burden (B) , participant (C) and population (D)subgroup analysis of QFT-PLUS compared with QFT-GIT. .... | 40 |
| Figure 13: Forest plot of studies estimating the positive rate in high-risk populations for age (A), TB burden (B), participant (C) and population (D)subgroup analysis of QFT-PLUS compared with T-SPOT.TB..... | 44 |
| Figure 14: Forest plot of studies estimating the positive rate in high-risk populations for age (A), TB burden (B), participant (C) and population (D)subgroup analysis of QFT-PLUS compared with TST. ....      | 46 |
| Figure 15: Sensitivity analysis of QFT-PLUS compared to QFT-GIT (A) and T-SPOT.TB (B) in patients with active TB.....                                                                                            | 48 |
| Figure 16: Sensitivity analysis of QFT-PLUS compared to QFT-GIT (A), T-SPOT.TB (B) and TST(C) in populations with very low risk of TB exposure.....                                                              | 49 |
| Figure 17: Sensitivity analysis of QFT-PLUS compared to QFT-GIT (A), T-SPOT.TB (B) and TST(C) in high-risk populations .....                                                                                     | 50 |
| Figure 18: Funnel plot of QFT-PLUS compared to QFT-GIT (A) and T-SPOT.TB (B) in patients with active TB .....                                                                                                    | 51 |
| Figure 19: Funnel plot of QFT-PLUS compared to QFT-GIT (A), T-SPOT.TB (B) and TST(C) in populations with very low risk of TB exposure .....                                                                      | 52 |
| Figure 20: Funnel plot of QFT-PLUS compared to QFT-GIT (A), T-SPOT.TB (B) and TST(C) in high-risk populations.....                                                                                               | 53 |

Supplementary Table 1: PRISMA checklist

| <b>Section/topic</b>      | <b>#</b> | <b>Checklist item</b>                                                                                                                                                                                                                                                                                       | <b>Reported on page #</b> |
|---------------------------|----------|-------------------------------------------------------------------------------------------------------------------------------------------------------------------------------------------------------------------------------------------------------------------------------------------------------------|---------------------------|
| <b>TITLE</b>              |          |                                                                                                                                                                                                                                                                                                             |                           |
| Title                     | 1        | Identify the report as a systematic review, meta-analysis, or both.                                                                                                                                                                                                                                         | 1                         |
| <b>ABSTRACT</b>           |          |                                                                                                                                                                                                                                                                                                             |                           |
| Structured summary        | 2        | Provide a structured summary including, as applicable: background; objectives; data sources; study eligibility criteria, participants, and interventions; study appraisal and synthesis methods; results; limitations; conclusions and implications of key findings; systematic review registration number. | 2                         |
| <b>INTRODUCTION</b>       |          |                                                                                                                                                                                                                                                                                                             |                           |
| Rationale                 | 3        | Describe the rationale for the review in the context of what is already known.                                                                                                                                                                                                                              | 3                         |
| Objectives                | 4        | Provide an explicit statement of questions being addressed with reference to participants, interventions, comparisons, outcomes, and study design (PICOS).                                                                                                                                                  | 4                         |
| <b>METHODS</b>            |          |                                                                                                                                                                                                                                                                                                             |                           |
| Protocol and registration | 5        | Indicate if a review protocol exists, if and where it can be accessed (e.g., Web address), and, if available, provide registration information including registration number.                                                                                                                               | 4                         |
| Eligibility criteria      | 6        | Specify study characteristics (e.g., PICOS, length of follow-up) and report characteristics (e.g., years considered, language, publication status) used as criteria for eligibility, giving rationale.                                                                                                      | 5                         |
| Information sources       | 7        | Describe all information sources (e.g., databases with dates of coverage, contact with study authors to identify additional studies) in the search and date last searched.                                                                                                                                  | 5                         |
| Search                    | 8        | Present full electronic search strategy for at least one database, including any limits used, such that it could be repeated.                                                                                                                                                                               | 5, Supplementary Table 2  |
| Study selection           | 9        | State the process for selecting studies (i.e., screening, eligibility, included in systematic review, and, if applicable, included in the meta-analysis).                                                                                                                                                   | 6                         |
| Data collection process   | 10       | Describe method of data extraction from reports (e.g., piloted forms, independently, in duplicate) and any processes for obtaining and confirming data from investigators.                                                                                                                                  | 6                         |
| Data items                | 11       | List and define all variables for which data were sought (e.g., PICOS, funding sources) and any assumptions and simplifications made.                                                                                                                                                                       | 6                         |

|                                    |    |                                                                                                                                                                                                                        |                                                       |
|------------------------------------|----|------------------------------------------------------------------------------------------------------------------------------------------------------------------------------------------------------------------------|-------------------------------------------------------|
| Risk of bias in individual studies | 12 | Describe methods used for assessing risk of bias of individual studies (including specification of whether this was done at the study or outcome level), and how this information is to be used in any data synthesis. | 7                                                     |
| Summary measures                   | 13 | State the principal summary measures (e.g., risk ratio, difference in means).                                                                                                                                          | 7                                                     |
| Synthesis of results               | 14 | Describe the methods of handling data and combining results of studies, if done, including measures of consistency (e.g., $I^2$ ) for each meta-analysis.                                                              | 7                                                     |
| Risk of bias across studies        | 15 | Specify any assessment of risk of bias that may affect the cumulative evidence (e.g., publication bias, selective reporting within studies).                                                                           | 8                                                     |
| Additional analyses                | 16 | Describe methods of additional analyses (e.g., sensitivity or subgroup analyses, meta-regression), if done, indicating which were pre-specified.                                                                       | 8                                                     |
| <b>RESULTS</b>                     |    |                                                                                                                                                                                                                        |                                                       |
| Study selection                    | 17 | Give numbers of studies screened, assessed for eligibility, and included in the review, with reasons for exclusions at each stage, ideally with a flow diagram.                                                        | 8                                                     |
| Study characteristics              | 18 | For each study, present characteristics for which data were extracted (e.g., study size, PICOS, follow-up period) and provide the citations.                                                                           | 8                                                     |
| Risk of bias within studies        | 19 | Present data on risk of bias of each study and, if available, any outcome level assessment                                                                                                                             | Supplementary Figure 15-17                            |
| Results of individual studies      | 20 | For all outcomes considered (benefits or harms), present, for each study: (a) simple summary data for each intervention group (b) effect estimates and confidence intervals, ideally with a forest plot.               | 8-11,<br>Supplementary Figure 1-8                     |
| Synthesis of results               | 21 | Present results of each meta-analysis done, including confidence intervals and measures of consistency.                                                                                                                | 8-11                                                  |
| Risk of bias across studies        | 22 | Present results of any assessment of risk of bias across studies.                                                                                                                                                      | Supplementary Figure 15-20                            |
| Additional analysis                | 23 | Give results of additional analyses, if done (e.g., sensitivity or subgroup analyses, meta-regression).                                                                                                                | Supplementary Table 18 and Supplementary Figure 15-20 |
| <b>DISCUSSION</b>                  |    |                                                                                                                                                                                                                        |                                                       |
| Summary of evidence                | 24 | Summarize the main findings including the strength of evidence for each main outcome; consider their relevance to key groups (e.g., healthcare providers, users, and policy makers).                                   | 12-13                                                 |

|                |    |                                                                                                                                                               |       |
|----------------|----|---------------------------------------------------------------------------------------------------------------------------------------------------------------|-------|
| Limitations    | 25 | Discuss limitations at study and outcome level (e.g., risk of bias), and at review-level (e.g., incomplete retrieval of identified research, reporting bias). | 13-14 |
| Conclusions    | 26 | Provide a general interpretation of the results in the context of other evidence, and implications for future research.                                       | 14    |
| <b>FUNDING</b> |    |                                                                                                                                                               |       |
| Funding        | 27 | Funding: Our study was financed by the Reserve Talent Development Project of Kunming Health Science and Technology (NO. 2022-SW [Reserve Talents]-006).       |       |

---

*From:* Moher D, Liberati A, Tetzlaff J, Altman DG, The PRISMA Group (2009). Preferred Reporting Items for Systematic Reviews and Meta-Analyses: The PRISMA Statement. PLoS Med 6(6): e1000097. DOI:10.1371/journal.pmed1000097

Supplementary Table 2: Search strategy

Pubmed

| <b>ID</b> | <b>Search</b>                             |
|-----------|-------------------------------------------|
| #1        | Mycobacterium tuberculosis Infections     |
| #2        | Mycobacterium tuberculosis Infection      |
| #3        | Kochs Disease                             |
| #4        | Koch's Disease                            |
| #5        | Koch Disease                              |
| #6        | Tuberculosis                              |
| #7        | Latent Tuberculosis                       |
| #8        | TB                                        |
| #9        | Latent TB                                 |
| #10       | 1 or 2 or 3 or 4 or 5 or 6 or 7 or 8 or 9 |
| #11       | Interferon-gamma Release Tests            |
| #12       | IGRA                                      |
| #13       | QFT-Plus                                  |
| #14       | QuantiFERON-TB-Plus                       |
| #15       | Interferon gamma assay                    |
| #16       | 11 or 12 or 13 or 14 or 15                |
| #17       | 10 AND 16                                 |

Embase

| <b>ID</b> | <b>Search</b>                         |
|-----------|---------------------------------------|
| #1        | Mycobacterium tuberculosis Infections |
| #2        | Mycobacterium tuberculosis Infection  |

- #3 Kochs Disease
  - #4 Koch's Disease
  - #5 Koch Disease
  - #6 Tuberculosis
  - #7 Latent Tuberculosis
  - #8 TB
  - #9 Latent TB
  - #10 1 or 2 or 3 or 4 or 5 or 6 or 7 or 8 or 9
  - #11 Interferon-gamma Release Tests
  - #12 IGRA
  - #13 QFT-Plus
  - #14 QuantiFERON-TB-Plus
  - #15 Interferon gamma assay
  - #16 11 or 12 or 13 or 14 or 15
  - #17 10 AND 16
-

Supplementary Table 3: Inclusion and partial exclusion for patients with active TB

|                   | Have no bias                                                                                                         | Might have bias (no score at quality assessment)                                                                                                                                     | Have bias (exclude)                                                                                                                                                                                                                                                                                                                                                            |
|-------------------|----------------------------------------------------------------------------------------------------------------------|--------------------------------------------------------------------------------------------------------------------------------------------------------------------------------------|--------------------------------------------------------------------------------------------------------------------------------------------------------------------------------------------------------------------------------------------------------------------------------------------------------------------------------------------------------------------------------|
| Active TB         | They were all tested by sputum culture and showed to be positive.                                                    | The population included in this study had sputum culture tests that were not positive, but had other clinical tests that were positive                                               | 1. Latent infection and normal population not fully excluded.                                                                                                                                                                                                                                                                                                                  |
| Head-to-head test | The aim of this study was to compare QFT-PLUS with QFT-GIT and T-SPOT.TB, each participant was tested within 3 days. | The aim of this study was to compare QFT-PLUS with QFT-GIT and T-SPOT.TB, but each participant was tested within 3-4 weeks or no time interval between the two tests was referenced. | 1. The time interval between tests was more than 4 weeks.<br>2. It is not the purpose of this article to compare QFT-PLUS with QFT-GIT and T-SPOT.TB, and there is no reference to the time interval between these tests.<br>3. Only QFT-PLUS positive patients were tested for QFT-GIT or T-SPOT.TB, or only QFT-GIT or T-SPOT.TB positive patients were tested for QFT-PLUS. |

Supplementary Table 4: Inclusion and partial exclusion for populations with very low risk of TB exposure

|                                               | Have no bias                                                                                                              | Might have bias (no score at quality assessment)                                                                                                                                          | Have bias (exclude)                                                                                                                                                                                                                                                                                                                                                                               |
|-----------------------------------------------|---------------------------------------------------------------------------------------------------------------------------|-------------------------------------------------------------------------------------------------------------------------------------------------------------------------------------------|---------------------------------------------------------------------------------------------------------------------------------------------------------------------------------------------------------------------------------------------------------------------------------------------------------------------------------------------------------------------------------------------------|
| Populations with very low risk of TB exposure | They should be asymptomatic and not at risk of infection                                                                  | They are at slight risk of infection                                                                                                                                                      | 1. Active and/or suspected cases are not excluded.<br>2. There is a definite risk of infection that could lead to active and/or suspected cases of TB                                                                                                                                                                                                                                             |
| Head-to-head test                             | The aim of this study was to compare QFT-PLUS with QFT-GIT, T-SPOT.TB and TST, each participant was tested within 3 days. | The aim of this study was to compare QFT-PLUS with QFT-GIT, T-SPOT.TB and TST, but each participant was tested within 3-4 weeks or no time interval between the two tests was referenced. | 1. The time interval between tests was more than 4 weeks.<br>2. It is not the purpose of this article to compare QFT-PLUS with QFT-GIT, T-SPOT.TB and TST, and there is no reference to the time interval between these tests.<br>3. Only QFT-PLUS positive patients were tested for QFT-GIT or T-SPOT.TB or TST, or only QFT-GIT or T-SPOT.TB or TST positive patients were tested for QFT-PLUS. |

Supplementary Table 5: Inclusion and partial exclusion for high-risk populations

|                       | Have no bias                                                                                | Might have bias (no score at quality assessment)                                                                                       | Have bias (exclude)                                                                                                                                                                                               |
|-----------------------|---------------------------------------------------------------------------------------------|----------------------------------------------------------------------------------------------------------------------------------------|-------------------------------------------------------------------------------------------------------------------------------------------------------------------------------------------------------------------|
| high-risk populations | They should be asymptomatic and indicate that active and/or suspected cases of tuberculosis | The aim of this study was to screen for LTBI, but there was no reference to whether active and/or suspected cases of TB were excluded. | 1. Active and/or suspected cases are not excluded.<br>2. The purpose of this article is not to screen for LTBI and there is no reference to whether active tuberculosis and/or suspected cases have been excluded |

|                   |                                                                                                                           |                                                                                                                                                                                           |                                                                                                                                                                                                                                                                                                                                                                                                   |
|-------------------|---------------------------------------------------------------------------------------------------------------------------|-------------------------------------------------------------------------------------------------------------------------------------------------------------------------------------------|---------------------------------------------------------------------------------------------------------------------------------------------------------------------------------------------------------------------------------------------------------------------------------------------------------------------------------------------------------------------------------------------------|
|                   | have been excluded.                                                                                                       |                                                                                                                                                                                           | 3. Only QFT-PLUS positive, QFT-PLUS negative, QFT-GIT, T-SPOT.TB and TST positive, or QFT-GIT, T-SPOT.TB and TST negative people were included                                                                                                                                                                                                                                                    |
| Head-to-head test | The aim of this study was to compare QFT-PLUS with QFT-GIT, T-SPOT.TB and TST, each participant was tested within 3 days. | The aim of this study was to compare QFT-PLUS with QFT-GIT, T-SPOT.TB and TST, but each participant was tested within 3-4 weeks or no time interval between the two tests was referenced. | 1. The time interval between tests was more than 4 weeks.<br>2. It is not the purpose of this article to compare QFT-PLUS with QFT-GIT, T-SPOT.TB and TST, and there is no reference to the time interval between these tests.<br>3. Only QFT-PLUS positive patients were tested for QFT-GIT or T-SPOT.TB or TST, or only QFT-GIT or T-SPOT.TB or TST positive patients were tested for QFT-PLUS. |

Supplementary Table 6: Populations considered high-risk

|                                           |                                                                                                                                                                                                                                              |
|-------------------------------------------|----------------------------------------------------------------------------------------------------------------------------------------------------------------------------------------------------------------------------------------------|
| Recent contacts                           | Both close/household and casual                                                                                                                                                                                                              |
| Immunocompromised patients                | 1.People living with HIV; 2.Chronic renal failure and/or haemodialysis; 3.Transplant recipients (organ or hematopoietic stem cell); 4.Drug and/or alcohol abusers; 5.Cancer (all types); 6.Malnourished (BMI $\leq$ 18.5 kg/m); 7.Silicosis. |
| With the possibility of contact           | 1.Occupational risk (e.g. healthcare worker); 2.Immigrants or refugees; 3.Army personnel.                                                                                                                                                    |
| With the possibility of immunosuppression | 1.IMID; 2. Prisoners; 3.Children; 4.Nursing home residents; 5.Homeless.                                                                                                                                                                      |

Supplementary Table 7: Details of excluded criteria

|                  |                                                                                                                                                                                                                                                               |
|------------------|---------------------------------------------------------------------------------------------------------------------------------------------------------------------------------------------------------------------------------------------------------------|
| Patients         | 1.We excluded studies that inclusion of populations do not meet the criteria.<br>2.We excluded studies that not head-to-head experiments.                                                                                                                     |
| Test conduct     | 1.We excluded studies that QFT-PLUS was not used.<br>2.We excluded studies that QFT-PLUS was not compared with QFT-GIT, T-SPOT.TB and TST<br>3.We excluded the studies that no comparator.<br>4. We excluded the studies that multiple comparisons were made. |
| Flow and outcome | 1.We excluded the studies that no full text available.<br>2.We excluded studies with a sample size of less than 10.                                                                                                                                           |

Supplementary Table 8: QUADAS-2 adapted quality assessment criteria for patients with active TB

|                     |                                                                                                                                                                                                                                                                                                                                                                                                                                                                                                                                                                                                                                                                                                                                                                                                                                                                                                                                                                                                                                                                                                                                                                                                                                                                                                                                                |
|---------------------|------------------------------------------------------------------------------------------------------------------------------------------------------------------------------------------------------------------------------------------------------------------------------------------------------------------------------------------------------------------------------------------------------------------------------------------------------------------------------------------------------------------------------------------------------------------------------------------------------------------------------------------------------------------------------------------------------------------------------------------------------------------------------------------------------------------------------------------------------------------------------------------------------------------------------------------------------------------------------------------------------------------------------------------------------------------------------------------------------------------------------------------------------------------------------------------------------------------------------------------------------------------------------------------------------------------------------------------------|
| Patient select bias | <p>Q1: Was a consecutive or random sample of patients enrolled?<br/>We scored “Yes” if a consecutive or random sample of eligible patients was Enrolled; “No” if patients were selected by convenience; and “Unclear” if the study did not report the manner in which patients were enrolled.</p> <p>Q2: Were all patients included have gold standard testing?<br/>We scored “Yes” if all patients received the gold standard; “No” if there are patients does not receive the gold standard and other clinical tests prove negative or no clinical tests prove; and “Unclear” if there are patients who did not receive the gold standard, but other clinical tests proved positive.</p> <p>Q3: Did the study have appropriate exclusions?<br/>We scored “Yes” if current active TB and people with TB symptom were excluded, or they were grouped separately, or the definition of LTBI was stated as asymptomatic; “No” if it was unclear that active TB and people with TB symptom were excluded; and “Unclear” if only active TB or people with TB symptom were excluded or grouped.</p>                                                                                                                                                                                                                                                 |
| Test conduct bias   | <p>Q4: Was the study conducted to compare QFT-PLUS with QFT-GIT, T.SPOT.TB and TST tests??<br/>We scored “Yes” if the study was conducted to compare QFT-PLUS with QFT-GIT, T.SPOT.TB and TST tests?, “No” if the study was not conducted to compare QFT-PLUS with QFT-GIT, T.SPOT.TB and TST tests?; “Unclear” if this was not stated or stated inadequately.</p> <p>Q5: If a threshold is used, was it confirmed beforehand?<br/>We scored “Yes” if the threshold values are used and predetermined, “No” if no prior determination; “Unclear” if there is no description.</p> <p>Q6: Was how the tests were conducted and interpreted adequately described?<br/>We scored “Yes” if the tests were conducted and interpreted adequately described, such as the cut-off, time interval of the results were read, and manufacturer information, or “performed as the manufacturer’s guidelines” was stated; and “No” if those information were not stated or stated inadequately.</p> <p>Q7: Was there an appropriate interval between QFT-PLUS with QFT-GIT, T.SPOT.TB and TST tests?<br/>We scored “Yes” if the two tests were paired or performed within 3 days, or "paired" comparison, “head-to-head” comparison was reported, and “No” if the interval was more than 3 days and less than 4 weeks; “Unclear” if this was not stated.</p> |
| Flow and outcome    | <p>Q8: Were the results of two tests interpreted without knowledge of each other?<br/>We scored “Yes” if the results of two tests were interpreted without knowledge of each other, or one test was interpreted blinded to another; “No” if blinding to test results were not done; and “Unclear” if this was not stated.</p> <p>Q9: Were all patients included in the analysis?<br/>We answered this question by comparing the number of participants included in the study and the number of individuals included in the 2x2 tables, test agreement data, or flow diagram. We scored ‘Yes’ if the number of participants enrolled was stated and corresponded to the number included in the analysis or if exclusions were adequately described. We scored “No” if there were participants missing or excluded from the analysis and there was no explanation given. We scored “Unclear” if we could not tell, e.g. because the number of participants enrolled and/or number of participants included in the analysis was not clearly stated.</p>                                                                                                                                                                                                                                                                                           |

Supplementary Table 9: Quality score of 12 studies for patients with active TB

| <b>Study</b>              | <b>1</b> | <b>2</b> | <b>3</b> | <b>4</b> | <b>5</b> | <b>6</b> | <b>7</b> | <b>8</b> | <b>9</b> | <b>Quality score</b> |
|---------------------------|----------|----------|----------|----------|----------|----------|----------|----------|----------|----------------------|
| Petruccioli et al<br>2017 | 0        | 0        | 0        | 1        | 1        | 1        | 0        | 1        | 1        | 5                    |
| Lee et al<br>2019         | 0        | 0        | 1        | 1        | 1        | 1        | 1        | 0        | 1        | 6                    |
| Fukushima et al<br>2021   | 0        | 0        | 1        | 1        | 1        | 1        | 1        | 0        | 1        | 6                    |
| Hong et al<br>2019        | 0        | 0        | 1        | 1        | 1        | 1        | 0        | 0        | 1        | 5                    |
| Lee et al<br>2021         | 0        | 0        | 1        | 1        | 1        | 0        | 1        | 0        | 1        | 5                    |
| Takeda et al<br>2020      | 0        | 1        | 1        | 1        | 1        | 1        | 1        | 0        | 1        | 7                    |
| Horne et al<br>2018       | 1        | 1        | 0        | 1        | 1        | 1        | 1        | 0        | 1        | 7                    |
| Kim et al<br>2020         | 0        | 1        | 0        | 1        | 1        | 1        | 1        | 0        | 1        | 6                    |
| Takasaki et al<br>2017    | 0        | 0        | 1        | 1        | 1        | 1        | 1        | 1        | 0        | 6                    |
| Hoffmann et al<br>2016    | 0        | 0        | 1        | 0        | 1        | 1        | 0        | 0        | 1        | 4                    |
| Kay et al<br>2019         | 0        | 0        | 1        | 0        | 1        | 0        | 0        | 0        | 1        | 3                    |
| Yi et al<br>2016          | 0        | 1        | 1        | 1        | 1        | 1        | 1        | 1        | 1        | 8                    |

Supplementary Table 10: QUADAS-2 adapted quality assessment criteria for populations with very low risk of TB exposure

|                     |                                                                                                                                                                                                                                                                                                                                                                                                                                                                                                                                                                                                                                                                                                                                                                                                                                                                                                                                                                                                                                                                                                                                                                                                                                                                                                                                                |
|---------------------|------------------------------------------------------------------------------------------------------------------------------------------------------------------------------------------------------------------------------------------------------------------------------------------------------------------------------------------------------------------------------------------------------------------------------------------------------------------------------------------------------------------------------------------------------------------------------------------------------------------------------------------------------------------------------------------------------------------------------------------------------------------------------------------------------------------------------------------------------------------------------------------------------------------------------------------------------------------------------------------------------------------------------------------------------------------------------------------------------------------------------------------------------------------------------------------------------------------------------------------------------------------------------------------------------------------------------------------------|
| Patient select bias | <p>Q1: Is the population included in this study at little or no risk of infection with tuberculosis?<br/>We scored “Yes” if they live and work in an environment where they are not exposed to TB; “No” if they have exposure to TB; and “Unclear” if the study did not report.</p> <p>Q2: Was a consecutive or random sample of patients enrolled?<br/>We scored “Yes” if a consecutive or random sample of eligible patients was Enrolled; “No” if patients were selected by convenience; and “Unclear” if the study did not report the manner in which patients were enrolled.</p> <p>Q3: Did the study have appropriate exclusions?<br/>We scored “Yes” if current active TB and people with TB symptom were excluded, or they were grouped separately, or the definition of LTBI was stated as asymptomatic; “No” if it was unclear that active TB and people with TB symptom were excluded; and “Unclear” if only active TB or people with TB symptom were excluded or grouped.</p>                                                                                                                                                                                                                                                                                                                                                      |
| Test conduct bias   | <p>Q4: Was the study conducted to compare QFT-PLUS with QFT-GIT, T.SPOT.TB and TST tests??<br/>We scored “Yes” if the study was conducted to compare QFT-PLUS with QFT-GIT, T.SPOT.TB and TST tests?; “No” if the study was not conducted to compare QFT-PLUS with QFT-GIT, T.SPOT.TB and TST tests?; “Unclear” if this was not stated or stated inadequately.</p> <p>Q5: Was how the tests were conducted and interpreted adequately described?<br/>We scored “Yes” if the tests were conducted and interpreted adequately described, such as the cut-off, time interval of the results were read, and manufacturer information, or “performed as the manufacturer’s guidelines” was stated; and “No” if those information were not stated or stated inadequately.</p> <p>Q6: Was there an appropriate interval between QFT-PLUS with QFT-GIT, T.SPOT.TB and TST tests?<br/>We scored “Yes” if the two tests were paired or performed within 3 days, or "paired" comparison, “head-to-head” comparison was reported, and “No” if the interval was more than 3 days and less than 4 weeks; “Unclear” if this was not stated.</p> <p>Q7: If a threshold is used, was it confirmed beforehand?<br/>We scored “Yes” if the threshold values are used and predetermined, “No” if no prior determination; “Unclear” if there is no description.</p> |
| t                   | <p>Q8: Were the results of two tests interpreted without knowledge of each other?<br/>We scored “Yes” if the results of two tests were interpreted without knowledge of each other, or one test was interpreted blinded to another; “No” if blinding to test results were not done; and “Unclear” if this was not stated.</p> <p>Q9: Were all patients included in the analysis?<br/>We answered this question by comparing the number of participants included in the study and the number of individuals included in the 2x2 tables, test agreement data, or flow diagram. We scored ‘Yes’ if the number of participants enrolled was stated and corresponded to the number included in the analysis or if exclusions were adequately described. We scored “No” if there were participants missing or excluded from the analysis and there was no explanation given. We scored “Unclear” if we could not tell, e.g. because the number of participants enrolled and/or number of participants included in the analysis was not clearly stated.</p>                                                                                                                                                                                                                                                                                           |

Supplementary Table 11: Quality score of 7 studies for populations with very low risk of TB exposure

| <b>Study</b>              | <b>1</b> | <b>2</b> | <b>3</b> | <b>4</b> | <b>5</b> | <b>6</b> | <b>7</b> | <b>8</b> | <b>9</b> | <b>Quality score</b> |
|---------------------------|----------|----------|----------|----------|----------|----------|----------|----------|----------|----------------------|
| Petruccioli et al<br>2017 | 1        | 0        | 0        | 1        | 1        | 0        | 1        | 0        | 1        | 5                    |
| Fukushima et al<br>2021   | 1        | 0        | 0        | 1        | 1        | 1        | 1        | 1        | 1        | 7                    |
| Hong et al<br>2019        | 1        | 0        | 1        | 1        | 1        | 0        | 1        | 0        | 1        | 6                    |
| Takasaki et al<br>2017    | 1        | 0        | 1        | 1        | 1        | 1        | 1        | 0        | 1        | 7                    |
| Yi et al<br>2016          | 1        | 0        | 1        | 1        | 1        | 1        | 1        | 1        | 1        | 8                    |
| Sürücüoğlu et al<br>2020  | 0        | 0        | 0        | 1        | 1        | 0        | 1        | 0        | 1        | 4                    |
| Böncüoğlu et al<br>2021   | 0        | 0        | 0        | 1        | 1        | 0        | 1        | 0        | 1        | 4                    |

Supplementary Table 12: QUADAS-2 adapted quality assessment criteria for high-risk groups

|                     |                                                                                                                                                                                                                                                                                                                                                                                                                                                                                                                                                                                                                                                                                                                                                                                                                                                                                                                                                                                                                                                                                                                                                                                                                                                                                                                                                |
|---------------------|------------------------------------------------------------------------------------------------------------------------------------------------------------------------------------------------------------------------------------------------------------------------------------------------------------------------------------------------------------------------------------------------------------------------------------------------------------------------------------------------------------------------------------------------------------------------------------------------------------------------------------------------------------------------------------------------------------------------------------------------------------------------------------------------------------------------------------------------------------------------------------------------------------------------------------------------------------------------------------------------------------------------------------------------------------------------------------------------------------------------------------------------------------------------------------------------------------------------------------------------------------------------------------------------------------------------------------------------|
| Patient select bias | <p>Q1: Was the study conducted to screen for LTBI?<br/>We scored “Yes” if the study was conducted to screen for LTBI; and “No” if the study was not conducted to screen for LTBI; “Unclear” if this was not stated or stated inadequately.</p> <p>Q2: Was a consecutive or random sample of patients enrolled?<br/>We scored “Yes” if a consecutive or random sample of eligible patients was Enrolled; “No” if patients were selected by convenience; and “Unclear” if the study did not report the manner in which patients were enrolled.</p> <p>Q3: Did the study have appropriate exclusions?<br/>We scored “Yes” if current active TB and people with TB symptom were excluded, or they were grouped separately, or the definition of LTBI was stated as asymptomatic; “No” if it was unclear that active TB and people with TB symptom were excluded; and “Unclear” if only active TB or people with TB symptom were excluded or grouped.</p>                                                                                                                                                                                                                                                                                                                                                                                           |
| Test conduct bias   | <p>Q4: Was the study conducted to compare QFT-PLUS with QFT-GIT, T.SPOT.TB and TST tests??<br/>We scored “Yes” if the study was conducted to compare QFT-PLUS with QFT-GIT, T.SPOT.TB and TST tests?; “No” if the study was not conducted to compare QFT-PLUS with QFT-GIT, T.SPOT.TB and TST tests?; “Unclear” if this was not stated or stated inadequately.</p> <p>Q5: Was how the tests were conducted and interpreted adequately described?<br/>We scored “Yes” if the tests were conducted and interpreted adequately described, such as the cut-off, time interval of the results were read, and manufacturer information, or “performed as the manufacturer’s guidelines” was stated; and “No” if those information were not stated or stated inadequately.</p> <p>Q6: Was there an appropriate interval between QFT-PLUS with QFT-GIT, T.SPOT.TB and TST tests?<br/>We scored “Yes” if the two tests were paired or performed within 3 days, or "paired" comparison, “head-to-head” comparison was reported, and “No” if the interval was more than 3 days and less than 4 weeks; “Unclear” if this was not stated.</p> <p>Q7: If a threshold is used, was it confirmed beforehand?<br/>We scored “Yes” if the threshold values are used and predetermined, “No” if no prior determination; “Unclear” if there is no description.</p> |
| t                   | <p>Q8: Were the results of two tests interpreted without knowledge of each other?<br/>We scored “Yes” if the results of two tests were interpreted without knowledge of each other, or one test was interpreted blinded to another; “No” if blinding to test results were not done; and “Unclear” if this was not stated.</p> <p>Q9: Were all patients included in the analysis?<br/>We answered this question by comparing the number of participants included in the study and the number of individuals included in the 2x2 tables, test agreement data, or flow diagram. We scored ‘Yes’ if the number of participants enrolled was stated and corresponded to the number included in the analysis or if exclusions were adequately described. We scored “No” if there were participants missing or excluded from the analysis and there was no explanation given. We scored “Unclear” if we could not tell, e.g. because the number of participants enrolled and/or number of participants included in the analysis was not clearly stated.</p>                                                                                                                                                                                                                                                                                           |

Supplementary Table 13: Quality score of 31 studies for high-risk groups

| <b>Study</b>            | <b>1</b> | <b>2</b> | <b>3</b> | <b>4</b> | <b>5</b> | <b>6</b> | <b>7</b> | <b>8</b> | <b>9</b> | <b>Quality score</b> |
|-------------------------|----------|----------|----------|----------|----------|----------|----------|----------|----------|----------------------|
| Zhang et al 2020        | 1        | 1        | 1        | 0        | 1        | 1        | 1        | 0        | 1        | 7                    |
| Lee et al 2019          | 0        | 0        | 1        | 1        | 1        | 1        | 1        | 1        | 0        | 6                    |
| Ryu et al 2018          | 1        | 1        | 0        | 1        | 1        | 1        | 1        | 0        | 1        | 7                    |
| Won et al 2020          | 1        | 0        | 0        | 1        | 1        | 1        | 1        | 0        | 1        | 6                    |
| Venkatappa et al 2019   | 1        | 0        | 0        | 1        | 1        | 1        | 1        | 0        | 1        | 6                    |
| Xu et al 2022           | 0        | 1        | 1        | 1        | 1        | 1        | 1        | 0        | 1        | 7                    |
| Takeda et al 2020       | 0        | 0        | 1        | 1        | 1        | 1        | 1        | 0        | 1        | 6                    |
| Moon et al 2017         | 1        | 1        | 0        | 1        | 1        | 1        | 1        | 0        | 1        | 7                    |
| Barcellini et al 2016   | 1        | 0        | 0        | 1        | 1        | 1        | 1        | 0        | 1        | 6                    |
| Morales et al 2017      | 1        | 1        | 0        | 1        | 1        | 1        | 1        | 0        | 1        | 7                    |
| Knierrer et al 2017     | 1        | 0        | 0        | 1        | 1        | 1        | 1        | 0        | 1        | 6                    |
| Chien et al 2018        | 1        | 0        | 1        | 1        | 1        | 1        | 1        | 0        | 1        | 6                    |
| Kim et al 2020          | 1        | 0        | 0        | 1        | 1        | 1        | 1        | 0        | 1        | 6                    |
| Moon et al 2020         | 0        | 0        | 0        | 1        | 0        | 1        | 1        | 0        | 1        | 4                    |
| Zhang et al 2019        | 0        | 1        | 1        | 0        | 1        | 0        | 1        | 0        | 0        | 4                    |
| Tsuyuzaki et al 2019    | 1        | 0        | 1        | 1        | 1        | 1        | 1        | 0        | 1        | 7                    |
| Kay et al 2019          | 0        | 0        | 0        | 1        | 1        | 0        | 0        | 0        | 1        | 3                    |
| Takeda et al 2020       | 1        | 0        | 1        | 1        | 1        | 1        | 1        | 0        | 1        | 7                    |
| Igari et al 2021        | 1        | 0        | 0        | 1        | 1        | 1        | 1        | 0        | 1        | 6                    |
| Igari et al 2017        | 1        | 0        | 0        | 1        | 1        | 1        | 1        | 0        | 1        | 6                    |
| Igari et al 2019        | 1        | 0        | 0        | 1        | 1        | 1        | 1        | 0        | 1        | 6                    |
| Blázquez et al 2021     | 1        | 0        | 0        | 1        | 1        | 1        | 1        | 0        | 1        | 6                    |
| Primaturia et al 2020   | 0        | 1        | 1        | 1        | 1        | 0        | 1        | 0        | 1        | 6                    |
| Surve et al 2021        | 1        | 0        | 1        | 1        | 1        | 0        | 1        | 0        | 1        | 6                    |
| Benachinmard et al 2021 | 1        | 0        | 0        | 1        | 1        | 0        | 1        | 0        | 1        | 5                    |
| Abdulkareem et al 2020  | 1        | 0        | 1        | 0        | 1        | 0        | 1        | 0        | 1        | 5                    |
| Chumpa et al            | 1        | 0        | 1        | 1        | 1        | 0        | 1        | 0        | 1        | 6                    |

|                           |   |   |   |   |   |   |   |   |   |   |
|---------------------------|---|---|---|---|---|---|---|---|---|---|
| 2022                      |   |   |   |   |   |   |   |   |   |   |
| Gatechompol et al<br>2021 | 1 | 0 | 1 | 0 | 1 | 0 | 1 | 1 | 1 | 6 |
| Süheyla et al<br>2020     | 1 | 0 | 0 | 1 | 1 | 0 | 1 | 0 | 1 | 5 |
| Chihota et al<br>2022     | 0 | 0 | 0 | 1 | 1 | 0 | 1 | 0 | 1 | 4 |
| Böncüoğlu et al<br>2021   | 0 | 0 | 0 | 1 | 1 | 0 | 1 | 0 | 1 | 4 |
| Gurjav et al<br>2019      | 0 | 0 | 0 | 0 | 1 | 0 | 1 | 0 | 1 | 3 |

Supplementary Table 14: Reasons for exclusion of 42 studies that were read in full-text review

|   | <b>First author</b> | <b>Year</b> | <b>Journal</b>                                             | <b>Title</b>                                                                                                                                             | <b>Reason</b>                                          |
|---|---------------------|-------------|------------------------------------------------------------|----------------------------------------------------------------------------------------------------------------------------------------------------------|--------------------------------------------------------|
| 1 | Daisy Y.            | 2022        | Journal of the American Academy of Dermatology             | A prospective cohort study comparing the performance of interferon gamma release assays in autoimmune skin diseases                                      | No full text available                                 |
| 2 | Igari H.            | 2017        | American Journal of Respiratory and Critical Care Medicine | The analysis of quantiferon-TB gold plus (4th generation QFT) in comparison with TSPOT in rheumatoid arthritis for latent tuberculosis infection         | No full text available                                 |
| 3 | Castellani C.       | 2021        | Annals of the Rheumatic Diseases                           | Are interferon-gamma release assays reliable to detect tuberculosis infection in patients with rheumatoid arthritis treated with janus kinase inhibitors | No full text available                                 |
| 4 | Ping-Huai W.        | 2020        | Scientific reports                                         | CD4 response of QuantiFERON-TB Gold Plus for positive consistency of latent tuberculosis infection in patients on dialysis                               | Multiple comparisons were made                         |
| 5 | Fukushima K.        | 2017        | American Journal of Respiratory and Critical Care Medicine | Clinical comparison study of t-spot, QFT-gold and QFT-plus in the detection of active pulmonary TB in Japan                                              | No full text available                                 |
| 6 | Lu A.               | 2019        | Experimental and therapeutic medicine                      | Interferon- $\gamma$ release assay in the diagnosis of active tuberculosis                                                                               | Inclusion of populations that do not meet the criteria |
| 7 | Daniel E.A.         | 2020        | BMC Infectious Diseases                                    | Comparative analysis of the performance of Quantiferon-TB Gold Plus and Quantiferon-TB Gold In-Tube Assays in a high TB prevalence setting               | No full text available                                 |
| 8 | Sofia S.            | 2021        | Pulmonology                                                | Comparing the cost-effectiveness of two screening strategies for latent tuberculosis infection in Portugal                                               | No comparator                                          |
| 9 | Alok kumar M.       | 2021        | Tuberculosis research and treatment                        | Comparison of Interferon-Gamma Release Assay and Tuberculin Skin Test for the Screening of Latent Tuberculosis in                                        | QFT-Plus not used in this study                        |

|    |                   |      |                                                |                                                                                                                                                                                                           |                                                        |
|----|-------------------|------|------------------------------------------------|-----------------------------------------------------------------------------------------------------------------------------------------------------------------------------------------------------------|--------------------------------------------------------|
| 10 | Keita T.          | 2020 | Journal of infection and chemotherapy          | Inflammatory Bowel Disease Patients: Indian Scenario Comparison of QuantiFERON-TB Gold Plus and T-SPOT.TB in the Diagnosis of Active Tuberculosis                                                         | No full text available                                 |
| 11 | Ock-Hwa K.        | 2020 | PloS one                                       | Comparison of the change in QuantiFERON-TB gold plus and QuantiFERON-TB gold in-tube results after preventive therapy for latent tuberculosis infection                                                   | Inclusion of populations that do not meet the criteria |
| 12 | Elitza S T.       | 2018 | Journal of clinical microbiology               | Comparison of the QuantiFERON-TB Gold Plus and QuantiFERON-TB Gold In-Tube Interferon Gamma Release Assays in Patients at Risk for Tuberculosis and in Health Care Workers                                | Inclusion of populations that do not meet the criteria |
| 13 | Laura H.          | 2022 | Diagnostic microbiology and infectious disease | Comparison of the QuantiFERON-TB® Gold Plus on LIAISON® XL and T-SPOT.TB for the diagnosis of latent Mycobacterium tuberculosis infection in a low tuberculosis incidence population                      | Inclusion of populations that do not meet the criteria |
| 14 | Portell Rigo I.M. | 2021 | Clinical Chemistry and Laboratory Medicine     | Concordance between interferon-gamma release assay (IGRA) and tuberculin skin test in the diagnosis of latent tuberculosis among immigrants                                                               | No full text available                                 |
| 15 | Roxnan Mansour G. | 2021 | BMC pediatrics                                 | Diagnosis of latent tuberculosis infection among pediatric household contacts of Iranian tuberculosis cases using tuberculin skin test, IFN- $\gamma$ release assay and IFN- $\gamma$ -induced protein-10 | Inclusion of populations that do not meet the criteria |
| 16 | Martinez-Lopez D. | 2021 | Arthritis and Rheumatology                     | Epidemiology of latent tuberculosis infection in patients with rheumatic immunemediated diseases. Single                                                                                                  | No full text available                                 |

|    |              |      |                                                            |                                                                                                                                                                                                                                                                                                                   |                                                          |
|----|--------------|------|------------------------------------------------------------|-------------------------------------------------------------------------------------------------------------------------------------------------------------------------------------------------------------------------------------------------------------------------------------------------------------------|----------------------------------------------------------|
| 17 | Hoon Hee L.  | 2021 | Clinical Rheumatology                                      | university study of 1117 patients<br>Evaluation of a lateral flow assay-based IFN- $\gamma$ release assay as a point-of-care test for the diagnosis of latent tuberculosis infection                                                                                                                              | QFT-PLUS is not compared with QFT-GIT, T-SPOT.TB and TST |
| 18 | F Stieber.   | 2021 | The International Journal of Tuberculosis and Lung Disease | Evaluation of a lateral-flow nanoparticle fluorescence assay for TB infection diagnosis                                                                                                                                                                                                                           | QFT-PLUS is not compared with QFT-GIT, T-SPOT.TB and TST |
| 19 | K Fukushima. | 2021 | Pulmonology                                                | First clinical evaluation of the QIArearch <sup>TM</sup> QuantiFERON-TB for tuberculosis infection and active pulmonary disease                                                                                                                                                                                   | QFT-PLUS is not compared with QFT-GIT, T-SPOT.TB and TST |
| 20 | Shafeque A.  | 2020 | Journal Clinical Microbiology                              | Fourth-generation quanti FERON-TB gold plus: What is the evidence?                                                                                                                                                                                                                                                | QFT-Plus not used in this study, No comparator           |
| 21 | Suu Soo A.   | 2021 | Journal of clinical medicine                               | Frequency and factors of indeterminate quantiferon-tb gold in-tube and quantiferon-tb gold plus test results in rheumatic diseases<br>Frequency of Positive Conversion of Interferon-Gamma Release Assay Results Among Patients With Inflammatory Bowel Disease Treated With Non-tumor Necrosis Factor Inhibitors | Not head-to-head experiments                             |
| 22 | Kyuwon K.    | 2021 | Frontiers in medicine                                      | Household contact investigation for the detection of active tuberculosis and latent tuberculosis: A comprehensive evaluation in two high-burden provinces in Iran                                                                                                                                                 | No comparator                                            |
| 23 | R M Ghanaiee | 2022 | New microbes and new infections                            | Inconsistency of QuantiFERON-TB Gold Test and Tuberculin Skin Test Results in the Evaluation of Latent Tuberculosis Infection                                                                                                                                                                                     | Inclusion of populations that do not meet the criteria   |
| 24 | Bagheri Z.   | 2021 | Molecular Genetics Microbiology and Virology               |                                                                                                                                                                                                                                                                                                                   | QFT-Plus not used in this study                          |

|    |                      |      |                                                            |                                                                                                                                                                                                                                                                                                        |                                                                                                                    |
|----|----------------------|------|------------------------------------------------------------|--------------------------------------------------------------------------------------------------------------------------------------------------------------------------------------------------------------------------------------------------------------------------------------------------------|--------------------------------------------------------------------------------------------------------------------|
| 25 | Julia M S.           | 2021 | International Journal of Infectious Diseases               | in Health Care Workers<br>Interferon gamma release assays for detection of latent Mycobacterium tuberculosis in older Hispanic people<br>Is the new interferon-gamma releasing assay beneficial for the diagnosis of latent and active mycobacterium tuberculosis infections in tertiary care setting? | Inclusion of populations that do not meet the criteria<br>QFT-PLUS is not compared with QFT-GIT, T-SPOT.TB and TST |
| 26 | Jaewan J.            | 2021 | Journal of Clinical Medicine                               | LIOFeron®/TB/LTBI: A novel and reliable test for LTBI and tuberculosis                                                                                                                                                                                                                                 | QFT-PLUS is not compared with QFT-GIT, T-SPOT.TB and TST                                                           |
| 27 | Chiara Della B.      | 2020 | International Journal of Infectious Diseases               | Modulation of interferon-gamma response to QuantiFERON-TB-plus detected by enzyme-linked immunosorbent assay in patients with active and latent tuberculosis infection                                                                                                                                 | No full text available                                                                                             |
| 28 | Elisa P.             | 2016 | International Journal of Mycobacteriology                  | A multicentre verification study of the QuantiFERON®-TB Gold Plus assay                                                                                                                                                                                                                                | Inclusion of populations that do not meet the criteria                                                             |
| 29 | E D Pieterman.       | 2018 | Tuberculosis (Edinburgh, Scotland)                         | Non-IFN $\gamma$ Whole Blood Cytokine Responses to Mycobacterium tuberculosis Antigens in HIV-exposed Infants                                                                                                                                                                                          | Not head-to-head experiments                                                                                       |
| 30 | Christine A.         | 2021 | The Pediatric Infectious Disease Journal                   | Performance of a rapid strip test for the serologic diagnosis of latent tuberculosis in children                                                                                                                                                                                                       | QFT-Plus not used in this study                                                                                    |
| 31 | Songsri K.           | 2015 | Journal of Clinical and Diagnostic Research                | The positive status of latent tuberculosis infection is more consistent by quantiFERON-TB gold plus than that by quantiFERON-TB gold In-tube                                                                                                                                                           | No full text available                                                                                             |
| 32 | Shu C.               | 2019 | American Journal of Respiratory and Critical Care Medicine | Quantiferon gold-plus and tuberculin skin test reactivity predictors in                                                                                                                                                                                                                                | No full text available                                                                                             |
| 33 | Carrizales-Luna J.P. | 2019 | Annals of the Rheumatic Diseases                           |                                                                                                                                                                                                                                                                                                        | No full text available                                                                                             |

|    |              |      |                                              |                                                                                                                                                                                                                                                                                                                                                                                                                                                                                                                    |                                                        |
|----|--------------|------|----------------------------------------------|--------------------------------------------------------------------------------------------------------------------------------------------------------------------------------------------------------------------------------------------------------------------------------------------------------------------------------------------------------------------------------------------------------------------------------------------------------------------------------------------------------------------|--------------------------------------------------------|
| 34 | Chien J.-Y.  | 2018 | Respirology                                  | patients with rheumatoid arthritis<br>Quantiferon-TB gold plus is more sensitive than quantiferon-TB gold in-tube for latent tuberculosis infection among residents in long-term care facility<br>QuantiFERON-TB Gold Plus Test in Diagnostics of Latent Tuberculosis Infection in Children Aged 1-14 in a Country with a Low Tuberculosis Incidence                                                                                                                                                               | No full text available                                 |
| 35 | Dagmara B-T. | 2021 | Polish Journal of Microbiology               | Retrospective Performance Analyses of over Two Million U.S. QuantiFERON Blood Sample Results                                                                                                                                                                                                                                                                                                                                                                                                                       | Not head-to-head experiments                           |
| 36 | Ciastia B.   | 2021 | Microbiology Spectrum                        | QuantiFERON-TB Plus, a Neifw-Generation Interferon Gamma Release Assay                                                                                                                                                                                                                                                                                                                                                                                                                                             | Inclusion of populations that do not meet the criteria |
| 37 | S A R Siegel | 2018 | Journal of Clinical Microbiology             | Spot on! evaluation of T-spot.TB following indeterminant quantiferon TB-gold plus in screening for latent tuberculosis<br>Stages of pregnancy and HIV affect diagnosis of tuberculosis infection and Mycobacterium tuberculosis (MTB)-induced immune response: Findings from PRACHITi, a cohort study in Pune, India: Stages of Pregnancy and HIV status influence TB diagnostic accuracy<br>Usefulness of interferon- $\gamma$ release assay for the diagnosis of latent tuberculosis infection in young children | Inclusion of populations that do not meet the criteria |
| 38 | Salman S.    | 2020 | Pathology                                    | Utility of tuberculin skin test and QuantiFERON TB gold-plus in the                                                                                                                                                                                                                                                                                                                                                                                                                                                | No full text available                                 |
| 39 | Ramesh B.    | 2021 | International Journal of Infectious Diseases |                                                                                                                                                                                                                                                                                                                                                                                                                                                                                                                    | QFT-Plus not used in this study                        |
| 40 | Ki Wook Y.   | 2016 | Korean Journal of Pediatrics                 |                                                                                                                                                                                                                                                                                                                                                                                                                                                                                                                    | QFT-Plus not used in this study                        |
| 41 | Rajan S.     | 2021 | International Journal of Rheumatic Diseases  |                                                                                                                                                                                                                                                                                                                                                                                                                                                                                                                    | QFT-Plus not used in this study                        |

|    |           |      |                                                             |                                                                                                                                                                                                                                                                                                             |                                                                              |
|----|-----------|------|-------------------------------------------------------------|-------------------------------------------------------------------------------------------------------------------------------------------------------------------------------------------------------------------------------------------------------------------------------------------------------------|------------------------------------------------------------------------------|
| 42 | Oh Joo K. | 2022 | Journal of<br>Microbiology,<br>Immunology, and<br>Infection | screening of latent<br>tuberculosis infection<br>in refractory<br>spondyloarthritis<br>patients<br>Performance<br>evaluation of newly<br>developed fluorescence<br>immunoassay-based<br>interferon-gamma<br>release assay for the<br>diagnosis of latent<br>tuberculosis infection<br>in healthcare workers | QFT-PLUS<br>is not<br>compared<br>with QFT-<br>GIT, T-<br>SPOT.TB<br>and TST |
|----|-----------|------|-------------------------------------------------------------|-------------------------------------------------------------------------------------------------------------------------------------------------------------------------------------------------------------------------------------------------------------------------------------------------------------|------------------------------------------------------------------------------|

---

Supplementary Table 15: Characteristics of the 12 studies included in the sensitivity analysis

| <b>First author, Year</b> | <b>Setting</b> | <b>TB burden</b> | <b>Comparator(s)</b>  | <b>No. of participants</b> | <b>Females</b> | <b>Median age (IQR)</b> | <b>Risk of bias</b> |
|---------------------------|----------------|------------------|-----------------------|----------------------------|----------------|-------------------------|---------------------|
| Petruccioli E,2017        | Italy          | 0–30             | QFT-GIT               | 69                         | 28(41%)        | 35(28-44)               | medium              |
| Meng-Rui Lee,2019         | Taiwan, China  | 31–100           | QFT-GIT               | 113                        | 49(43.4%)      | NS                      | medium              |
| Kiyoyasu Fukushima,2021   | Japan          | 0–30             | QFT-GIT and T.SPOT.TB | 142                        | 60(42.3%)      | 84(76-89)               | medium              |
| Ji Young Hong,2019        | South Korea    | 31-100           | QFT-GIT               | 33                         | 4(12.1%)       | 17(17-24)               | medium              |
| Jung-Kyu Lee,2021         | South Korea    | 31-100           | QFT-GIT               | 63                         | 15(23.8%)      | NS                      | medium              |
| Keita Takeda,2020         | Japan          | 0–30             | QFT-GIT and T.SPOT.TB | 76                         | 26 (34.2%)     | 57.7(17-96)             | low                 |
| D. J. Horne,2018          | USA and Japan  | 0–30             | QFT-GIT               | 164                        | 64(39%)        | NS                      | low                 |
| Soo Han Kim,2020          | South Korea    | 31-100           | QFT-GIT               | 14                         | NS             | NS                      | medium              |
| Jin Takasaki,2017         | Japan          | 0–30             | QFT-GIT and T.SPOT.TB | 99                         | 34(34.3%)      | 42 (29-55)              | medium              |
| Harald Hoffmann,2016      | Germany        | 0–30             | QFT-GIT               | 57                         | NS             | NS                      | medium              |
| Alexander W. Kay,2019     | USA            | 0–30             | QFT-GIT               | 12                         | 5 (42%)        | NS                      | high                |
| Lina Yi(2016)             | Japan          | 0–30             | QFT-GIT               | 162                        | 33(20.4%)      | 59 (39–70)              | low                 |

IQR, interquartile range; NR, not reported; QFT-GIT, QuantiFERON-TB Gold In-Tube

Supplementary Table 16: Characteristics of the 7 studies included in the specificity analysis

| <b>First author, Year</b> | <b>Setting</b> | <b>TB burden</b> | <b>Comparator(s)</b>  | <b>No. of participants</b> | <b>Females</b> | <b>Median age (IQR)</b> | <b>Risk of bias</b> |
|---------------------------|----------------|------------------|-----------------------|----------------------------|----------------|-------------------------|---------------------|
| Petruccioli E,2017        | Italy          | 0–30             | QFT-GIT               | 19                         | 10(53%)        | 43(33-48)               | medium              |
| Kiyoyasu Fukushima,2021   | Japan          | 0–30             | QFT-GIT and T.SPOT.TB | 118                        | 64(54.2%)      | 39 (32–42)              | low                 |
| Ji Young Hong,2019        | South Korea    | 31-100           | QFT-GIT               | 27                         | 22(81.5%)      | 42(35-46)               | medium              |
| Jin Takasaki,2017         | Japan          | 0–30             | QFT-GIT and T.SPOT.TB | 106                        | 86(81.1%)      | 20(20-21)               | low                 |
| Lina Yi,2016              | Japan          | 0–30             | QFT-GIT               | 212                        | 107(50.5%)     | 20(19–21)               | low                 |
| Prof. Dr. Süheyla,2020    | Turkey         | 0–30             | TST                   | 30                         | 17(56.7%)      | NS                      | medium              |
| Elif Böncüoğlu, MD (2021) | Turkey         | 0–30             | TST                   | 121                        | NS             | NS                      | medium              |

Supplementary Table 17: Characteristics of the 31 studies included in the positive rates

| <b>First author, Year</b>        | <b>Setting</b> | <b>TB burden</b> | <b>Comparator(s)</b>  | <b>No. of participants</b> | <b>Females</b> | <b>Median age (IQR)</b> | <b>Risk of bias</b> |
|----------------------------------|----------------|------------------|-----------------------|----------------------------|----------------|-------------------------|---------------------|
| H. Zhang,2020                    | China          | 31–100           | QFT-GIT               | 338                        | NS             | NS                      | low                 |
| Meng-Rui Lee,2019                | Taiwan, China  | 31–100           | QFT-GIT               | 223                        | 111(49.8%)     | NS                      | low                 |
| Mi Ra Ryu,2018                   | South Korea    | 31–100           | QFT-GIT               | 317                        | 112(35.3%)     | 53                      | low                 |
| Dongju Won,2020                  | South Korea    | 31–100           | QFT-GIT               | 220                        | 97(44.1%)      | 47 (28–58)              | medium              |
| Thara K. Venkatappa,2019         | USA            | 0–30             | QFT-GIT               | 508                        | 250(49.2%)     | 32(19-44.5)             | low                 |
| Yuzhen Xu,2022                   | China          | 31–100           | QFT-GIT               | 278                        | 120(43.2%)     | 52(38–64)               | low                 |
| Keita Takeda,2020                | Japan          | 0–30             | QFT-GIT and T.SPOT.TB | 35                         | 11(31.4%)      | 58.6(22-86)             | medium              |
| Hee-Won Moon,2017                | USA            | 0–30             | QFT-GIT               | 987                        | 696(69.5%)     | NS                      | low                 |
| Lucia Barcellini,2016            | Italy          | 0–30             | QFT-GIT               | 119                        | 56 (47.1%)     | 38                      | medium              |
| Elia Noemi Gallegos Morales,2017 | Germany        | 0–30             | QFT-GIT               | 134                        | 72 (53.7%)     | 25.1                    | low                 |
| J.Knierrerr,2017                 | Germany        | 0–30             | QFT-GIT               | 41                         | 19(46.3%)      | 25.5                    | medium              |
| Jung-Yien Chien,2018             | Taiwan, China  | 31–100           | QFT-GIT               | 229                        | 112(48.9%)     | 80                      | low                 |
| Soo Han Kim,2020                 | South Korea    | 31–100           | QFT-GIT               | 14                         | NS             | NS                      | medium              |
| Hee-Won Moon,2020                | South Korea    | 31–100           | QFT-GIT               | 69                         | NS             | 35(27-50)               | medium              |
| Haoran Zhang,2019                | China          | 31–100           | QFT-GIT and T.SPOT.TB | 597                        | 195(31.66%)    | 47(41-56)               | high                |
| Mizue Tsuyuzaki,2019             | Japan          | 0–30             | QFT-GIT               | 412                        | 192(46.6%)     | 44                      | low                 |
| Alexander W. Kay,2019            | USA            | 0–30             | QFT-GIT               | 46                         | 27(59%)        | NS                      | high                |
| Keita Takeda,2020                | Japan          | 0–30             | QFT-GIT               | 50                         | 45(90%)        | 29.3 (21-               | medium              |

|                               |               |         |           |      |            | 45)         |        |
|-------------------------------|---------------|---------|-----------|------|------------|-------------|--------|
| Hidetoshi Igari,2021          | Japan         | 0–30    | T.SPOT.TB | 184  | 24(13%)    | 49(40-58)   | medium |
| Hidetoshi Igari,2017          | Japan         | 0–30    | T.SPOT.TB | 154  | 126(81.8%) | 66.5        | medium |
| Hidetoshi Igari,2019          | Japan         | 0–30    | T.SPOT.TB | 136  | 55(40.4%)  | 49          | medium |
| Ana Fernández-Blázquez,2021   | Japan         | 0–30    | T.SPOT.TB | 1464 | 728(49.7%) | NS          | medium |
| Cory Primaturia,2020          | Indonesia     | 201–    | TST       | 71   | 37(52.1%)  | 11.8        | medium |
| Suchitra Surve,2021           | India         | 101–200 | TST       | 123  | NS         | 3           | medium |
| Kirtilaxmi Benachinmard,2021  | India         | 101–200 | TST       | 77   | 47(61%)    | NS          | medium |
| Fatima Nawaf Abdulkareem,2020 | India         | 101–200 | TST       | 309  | NS         | NS          | medium |
| Nuntana Chumpa,2022           | Thailand      | 101–200 | TST       | 158  | 74(46.8%)  | 22          | low    |
| Sivaporn Gatechompol,2021     | Thailand      | 101–200 | TST       | 294  | 0(0%)      | 38(32–50)   | low    |
| Prof. Dr. Süheyla,2020        | Turkey        | 0–30    | TST       | 92   | 40(43.5%)  | 41.8(18-72) | medium |
| Violet N.Chihota,2022         | South African | 201–    | TST       | 235  | 4(1.7%)    | 48 (44–53)  | medium |
| Elif Böncüoğlu, MD,2021       | Turkey        | 0–30    | TST       | 99   | NS         | NS          | medium |
| U. Gurjav,2019                | Mongolia      | 201–    | TST       | 285  | 151(53.0%) | NS          | high   |

IQR, interquartile range; NR, not reported; QFT-GIT, QuantiFERON-TB Gold In-Tub

Supplementary Table 18: Linear regression test of funnel plot asymmetry results of QFT-PLUS QFT-PLUS compared to QFT-GIT, T-SPOT.TB and TST in in three populations.

|           | <b>patients with active TB</b> |           |                | <b>populations with very low risk of TB exposure</b> |           |                | <b>high-risk populations</b> |           |                |
|-----------|--------------------------------|-----------|----------------|------------------------------------------------------|-----------|----------------|------------------------------|-----------|----------------|
|           | <b>t</b>                       | <b>df</b> | <b>p-value</b> | <b>t</b>                                             | <b>df</b> | <b>p-value</b> | <b>t</b>                     | <b>df</b> | <b>p-value</b> |
| QFT-GIT   | 0.12                           | 9         | 0.9100         | -5.74                                                | 1         | 0.1098         | -1.37                        | 16        | 0.1905         |
| T-SPOT.TB | -5.05                          | 1         | 0.1244         | NA                                                   | NA        | NA             | 1.22                         | 4         | 0.2900         |
| TST       | NA                             | NA        | NA             | NA                                                   | NA        | NA             | -1.24                        | 8         | 0.2516         |

Figure 1: Forest plot of studies estimating the sensitivity of QFT-Plus (A) and QFT-GIT (B) in patients with active tuberculosis

### A. QFT-Plus

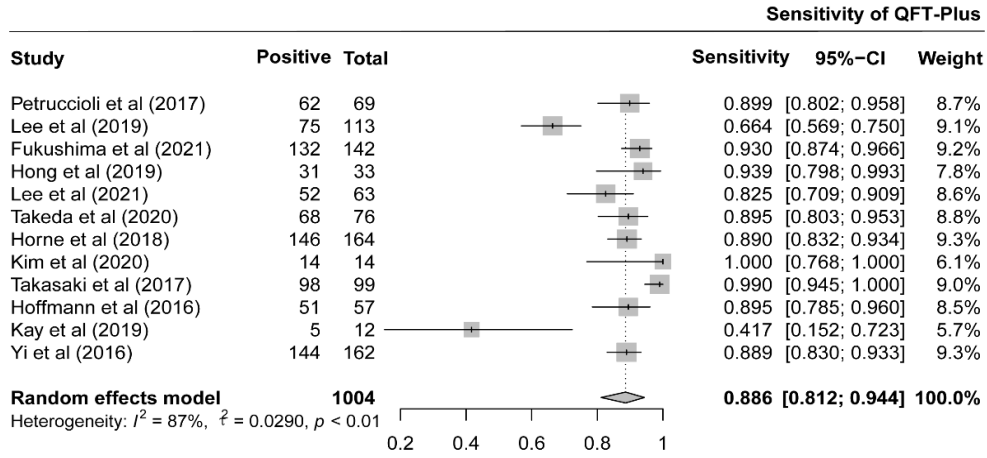

### B. QFT-GIT

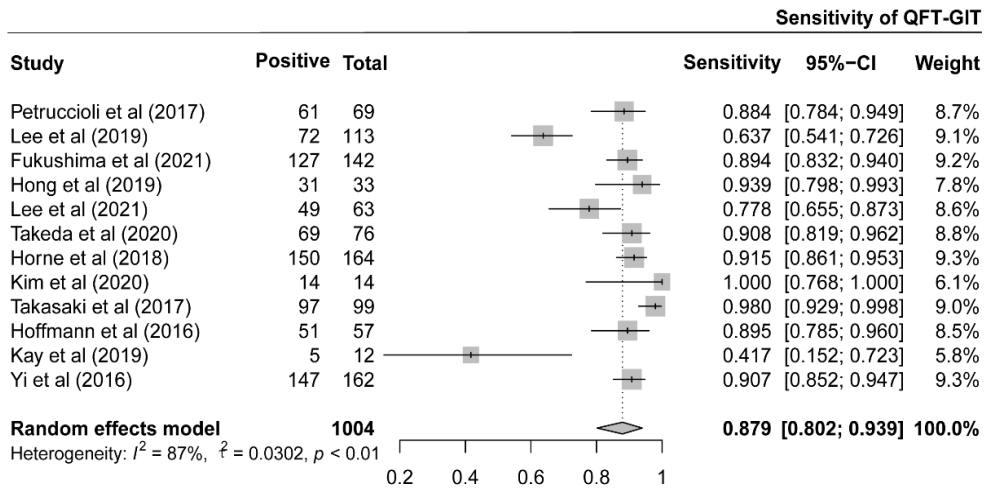

Figure 2: Forest plot of studies estimating the sensitivity of QFT-Plus (A) and T-SPOT.TB (B) in patients with active tuberculosis

A. QFT-Plus

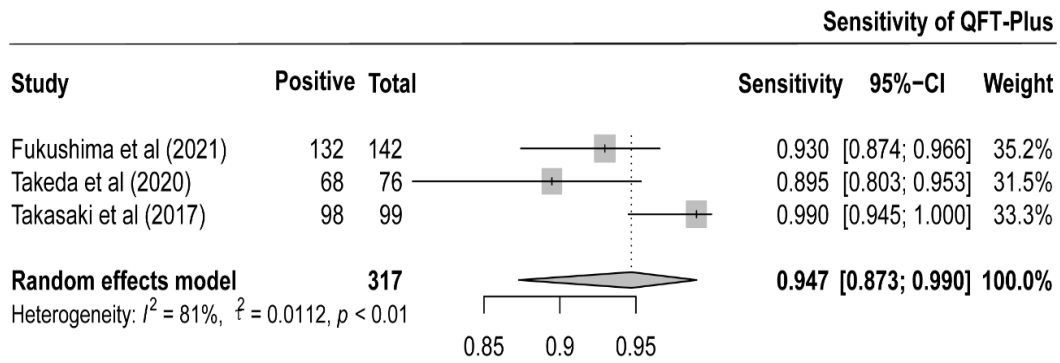

B. T-SPOT.TB

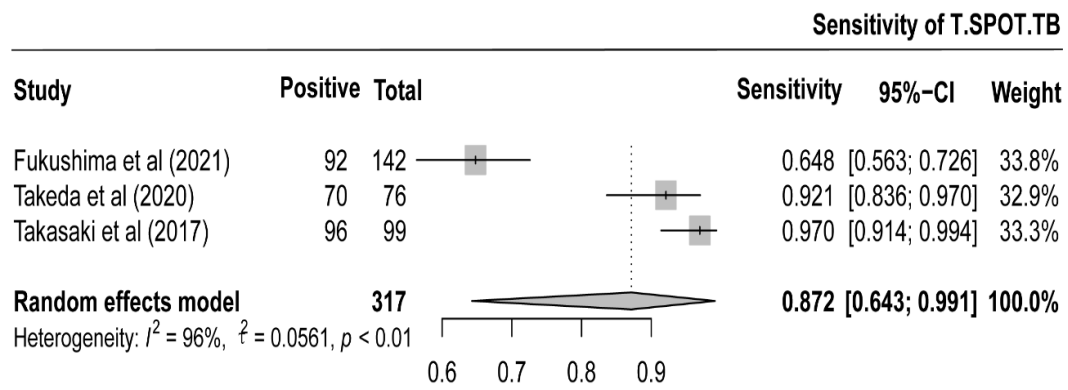

Figure 3: Forest plot of studies estimating the specificity of QFT-Plus (A) and QFT-GIT (B) in populations with very low risk of TB exposure.

A. QFT-Plus

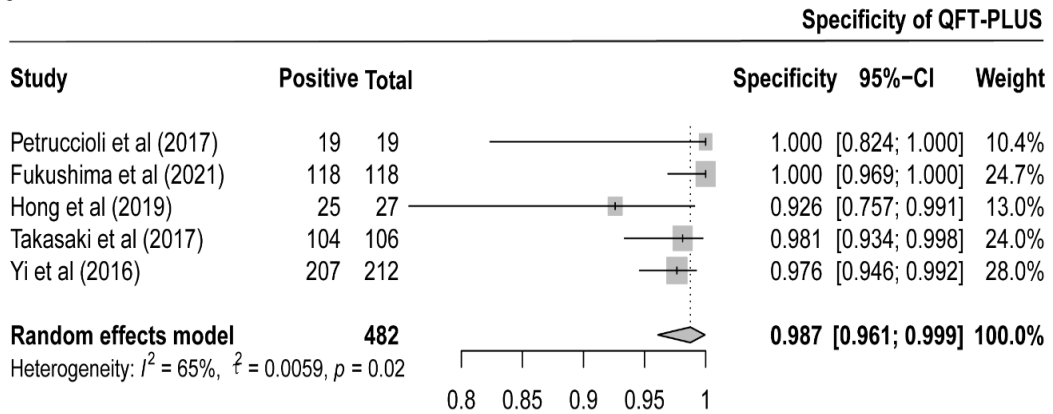

B. QFT-GIT

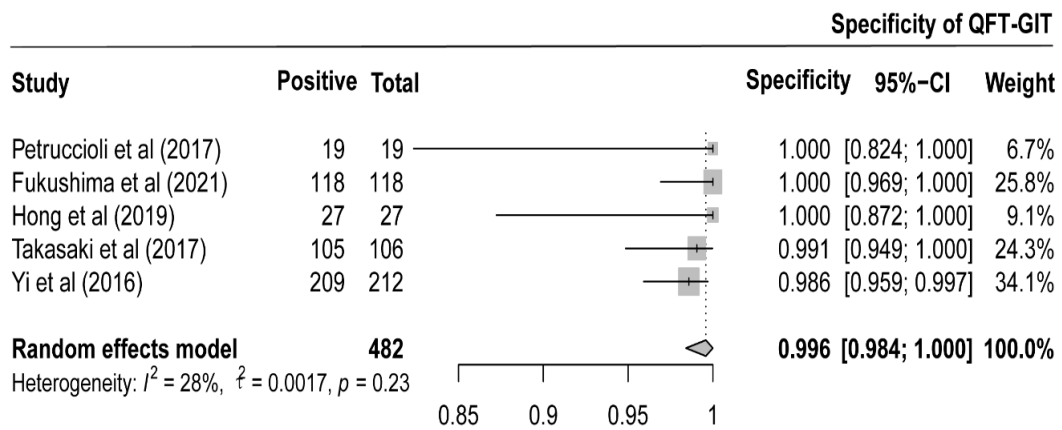

Figure 4: Forest plot of studies estimating the specificity of QFT-Plus (A) and T-SPOT.TB (B) in populations with very low risk of TB exposure.

### A. QFT-Plus

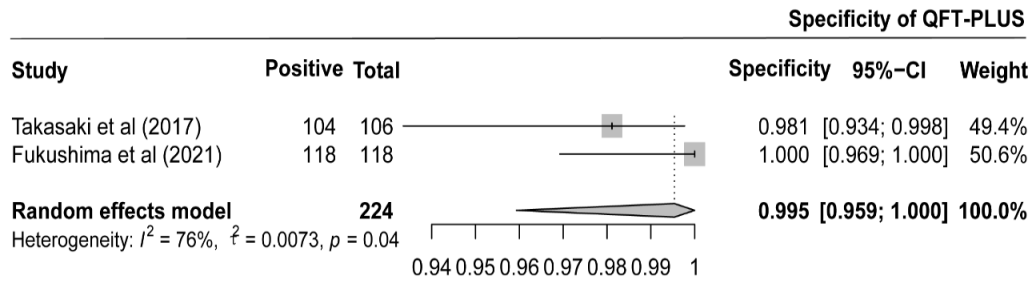

### B. T-SPOT.TB

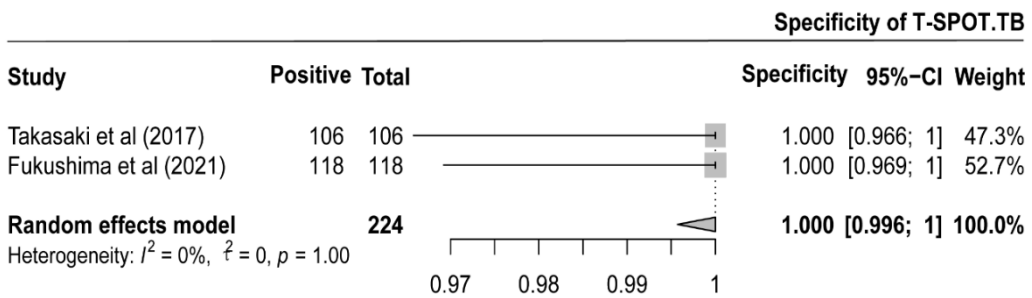

Figure 5: Forest plot of studies estimating the specificity of QFT-Plus (A) and TST (B) in populations with very low risk of TB exposure.

A. QFT-Plus

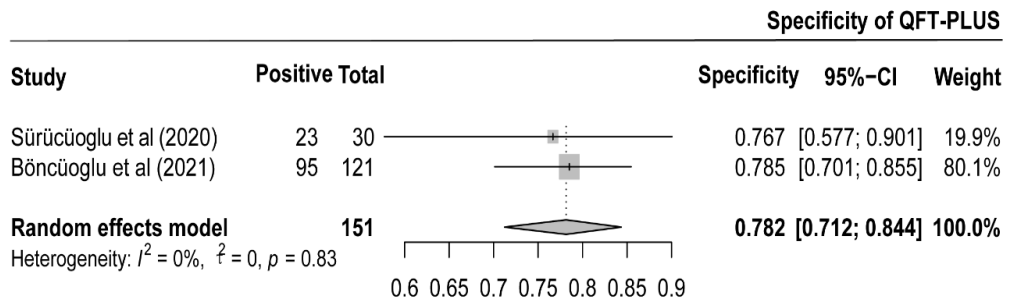

B. TST

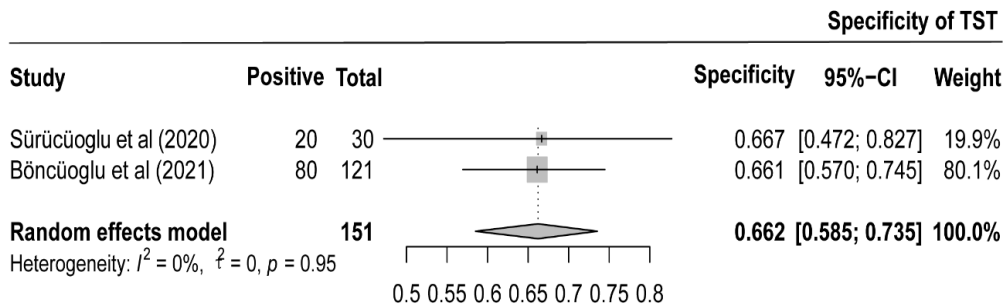

Figure 6: Forest plot of studies estimating the positive rate Plus (A) and QFT-GIT (B) in high-risk populations.

A.QFT-Plus

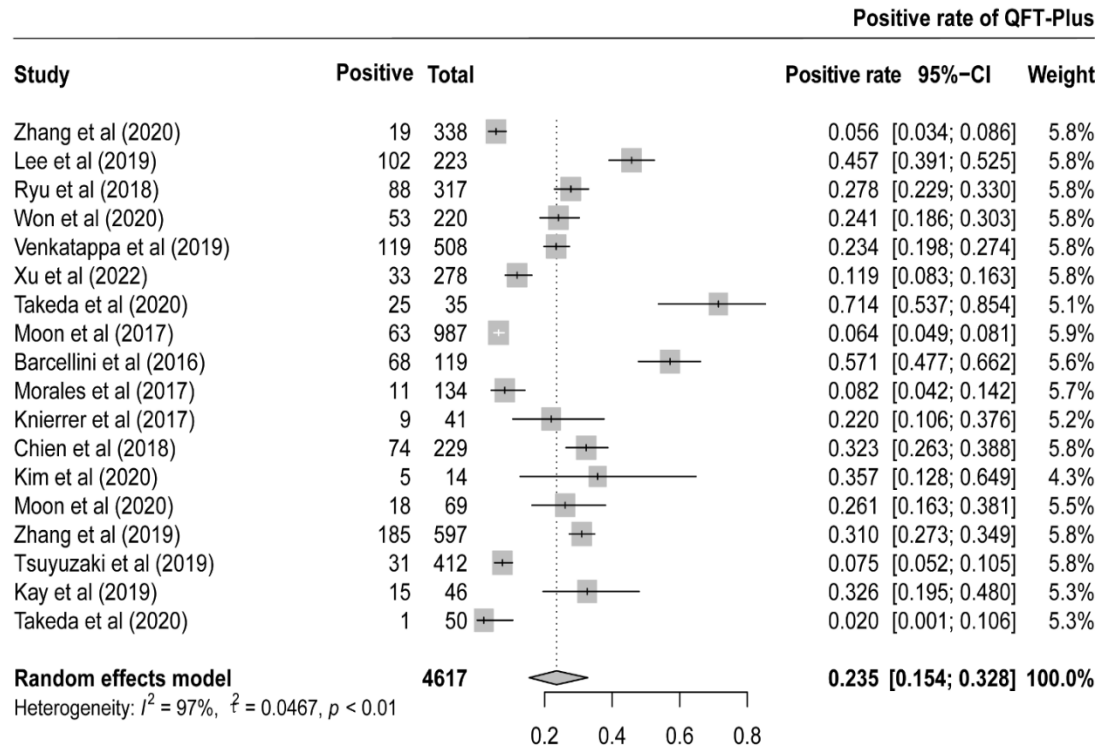

B.QFT-GIT

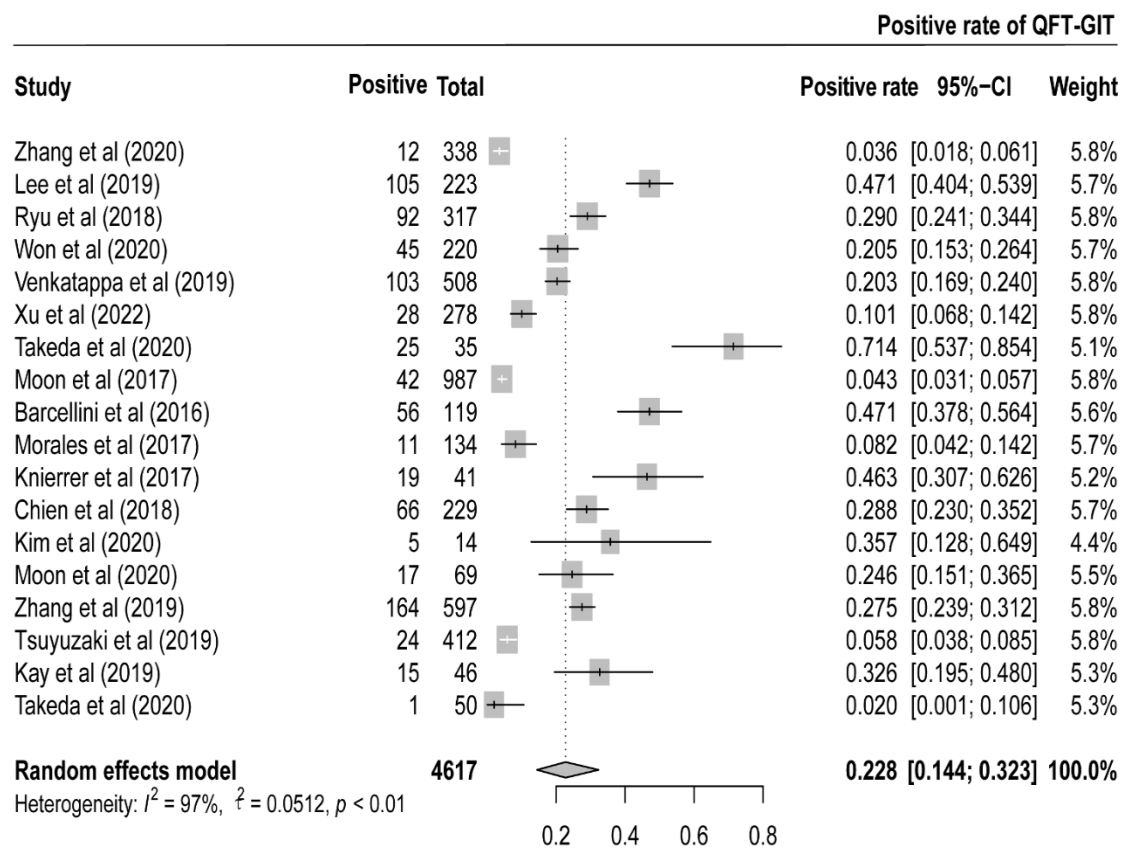

Figure 7: Forest plot of studies estimating the positive rate of QFT-Plus (A) and T-SPOT.TB (B) in high-risk populations.

### A. QFT-Plus

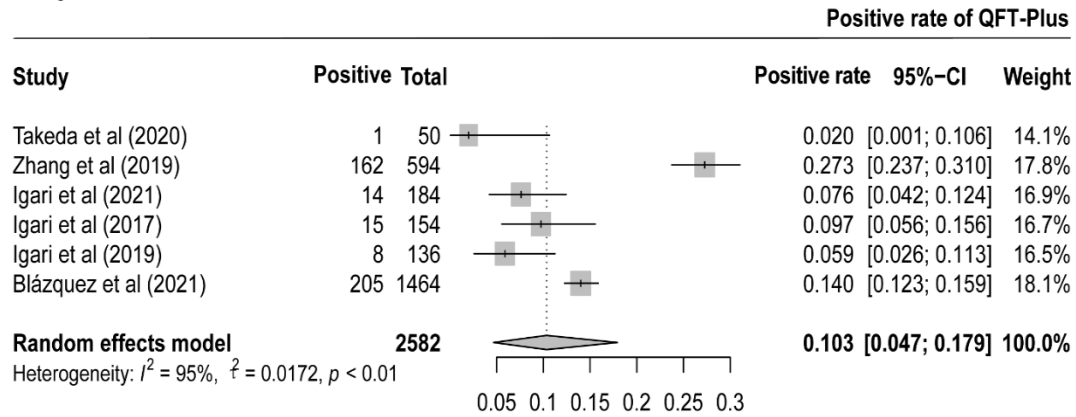

### B. T-SPOT.TB

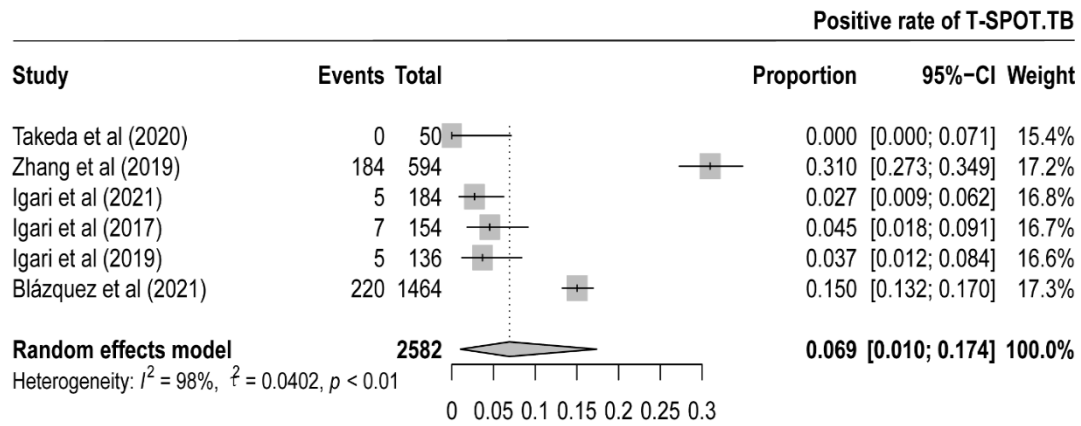

Figure 8: Forest plot of studies estimating the positive rate of QFT-Plus (A) and TST (B) in high-risk populations.

### A. QFT-Plus

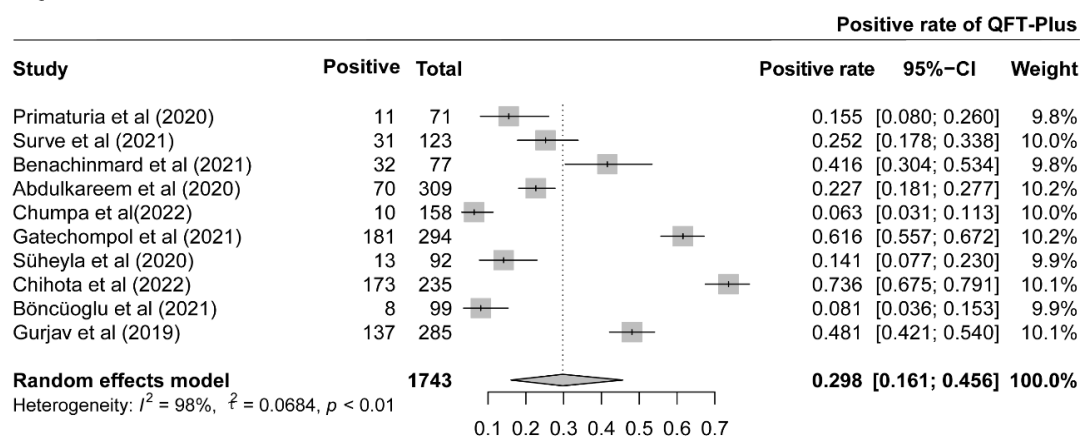

### B. TST

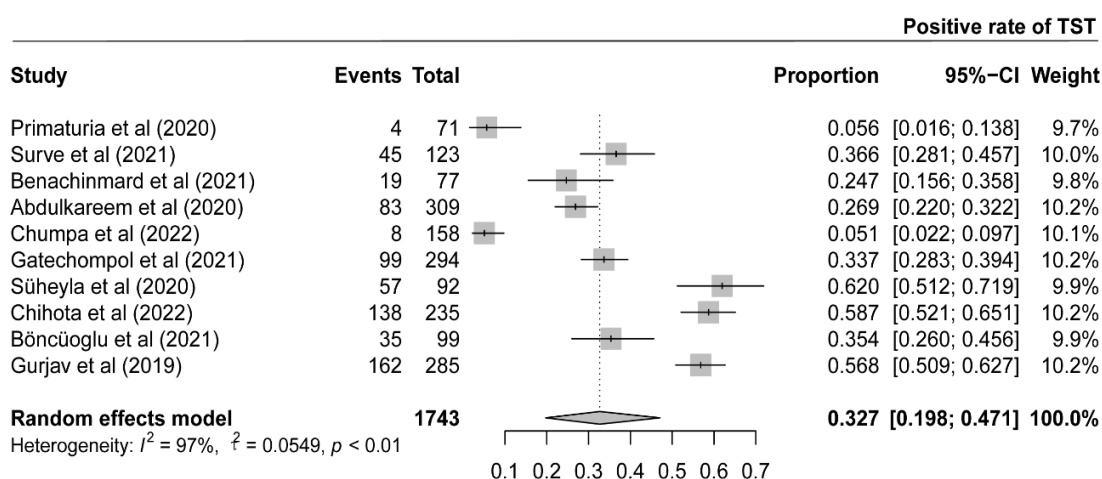

Figure 9: Forest plot of studies estimating the sensitivity in patients with active tuberculosis for age (A), TB burden (B) and participant (C) subgroup analysis of QFT-PLUS compared with QFT-GIT.

A.Age

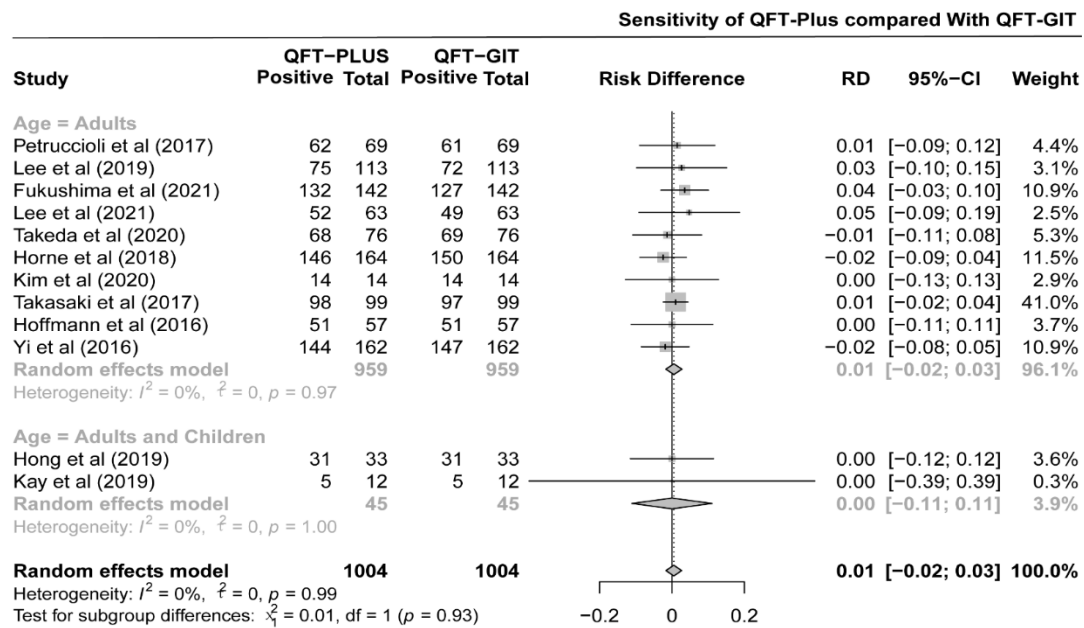

B.TB burden

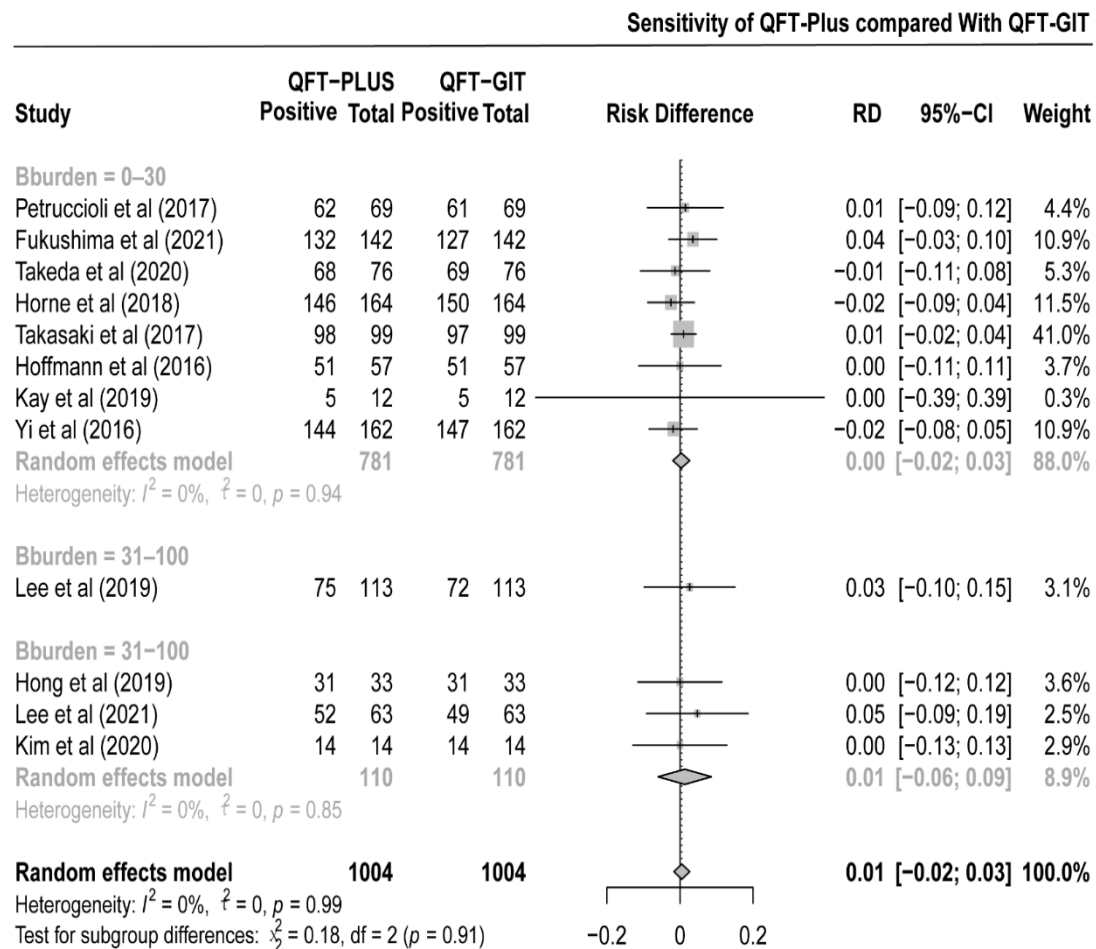

## C. Participant

### Sensitivity of QFT-Plus compared With QFT-GIT

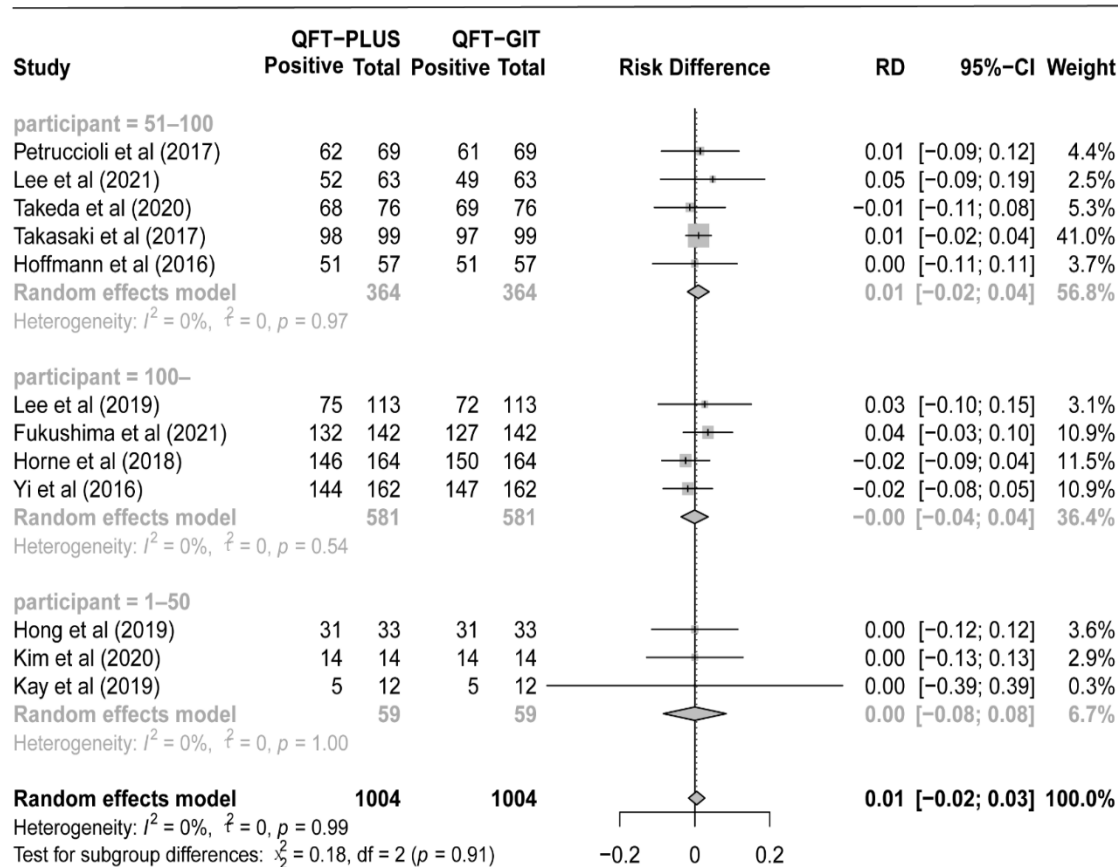

Figure 10: Forest plot of studies estimating the sensitivity in patients with active tuberculosis for participant subgroup analysis of QFT-PLUS compared with T-SPOT.TB.

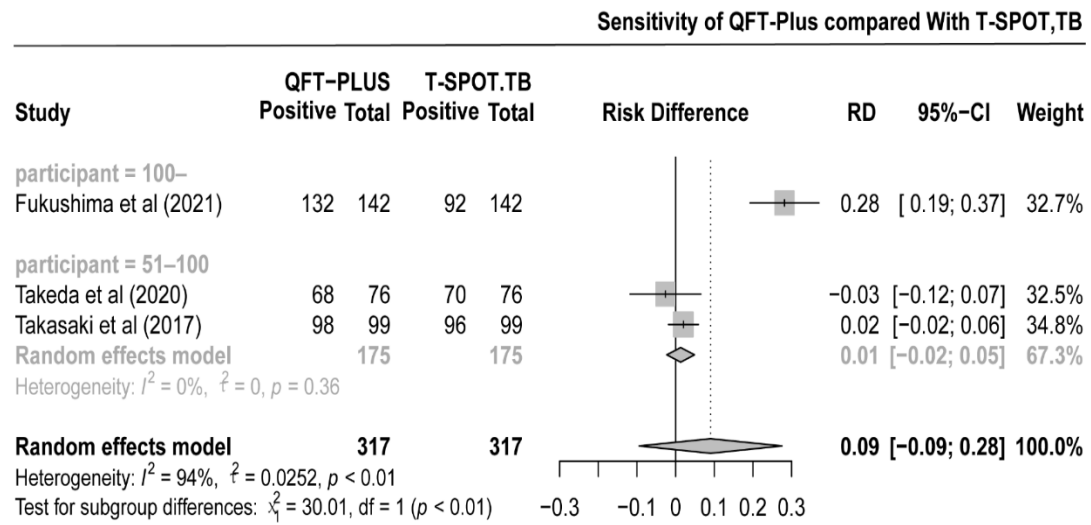

Figure 11: Forest plot of studies estimating the Specificity in populations with very low risk of TB exposure for TB burden (A) and participant (B) subgroup analysis of QFT-PLUS compared with QFT-GIT.

A. TB burden

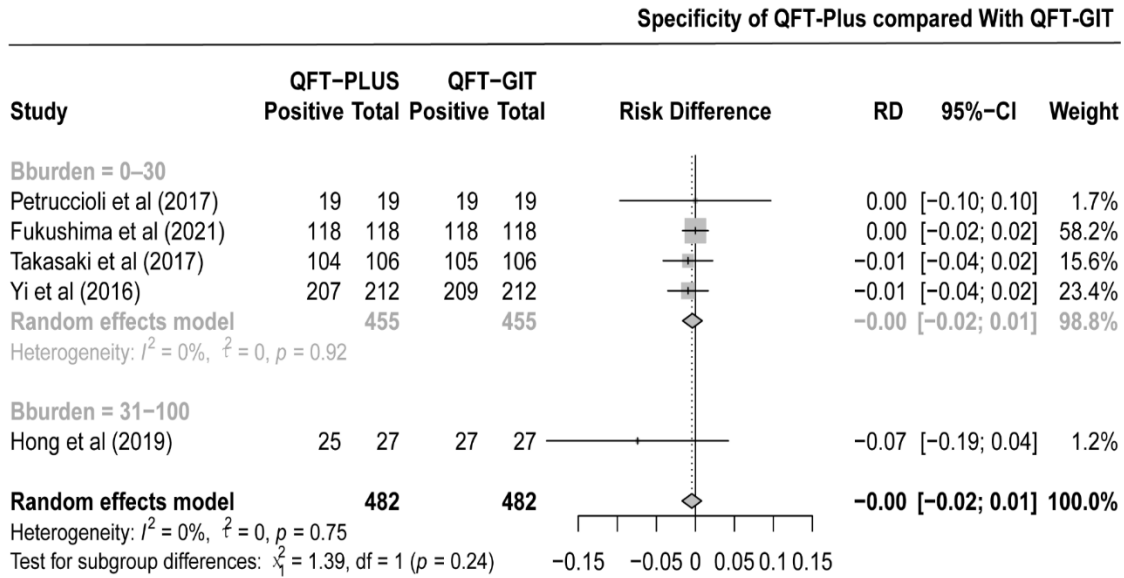

B. Participant

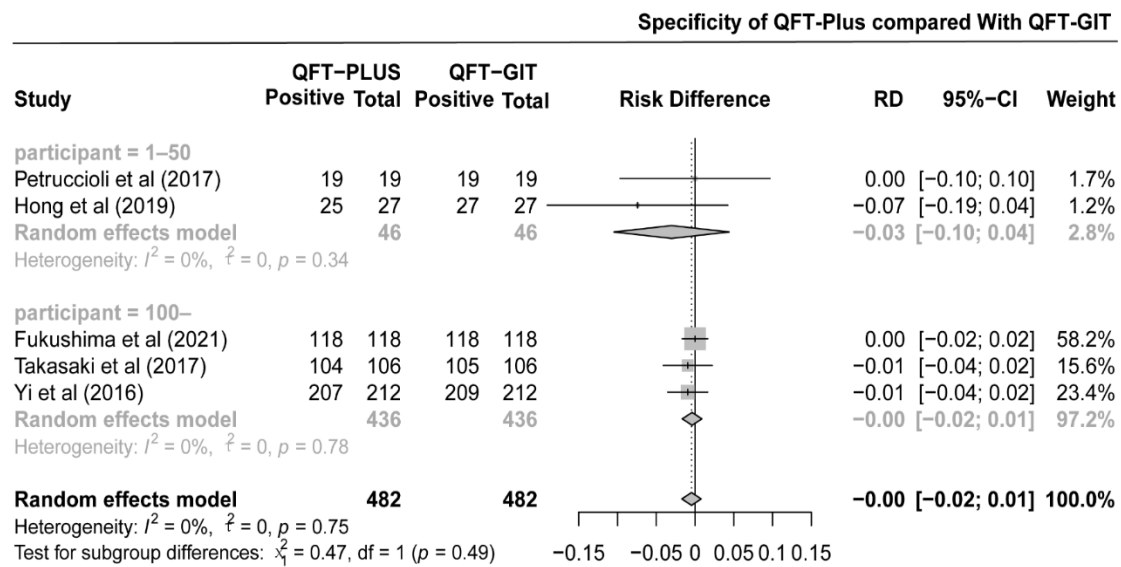

Figure 12: Forest plot of studies estimating the positive rate in high-risk populations for age (A), TB burden (B), participant (C) and population (D) subgroup analysis of QFT-PLUS compared with QFT-GIT.

A.Age

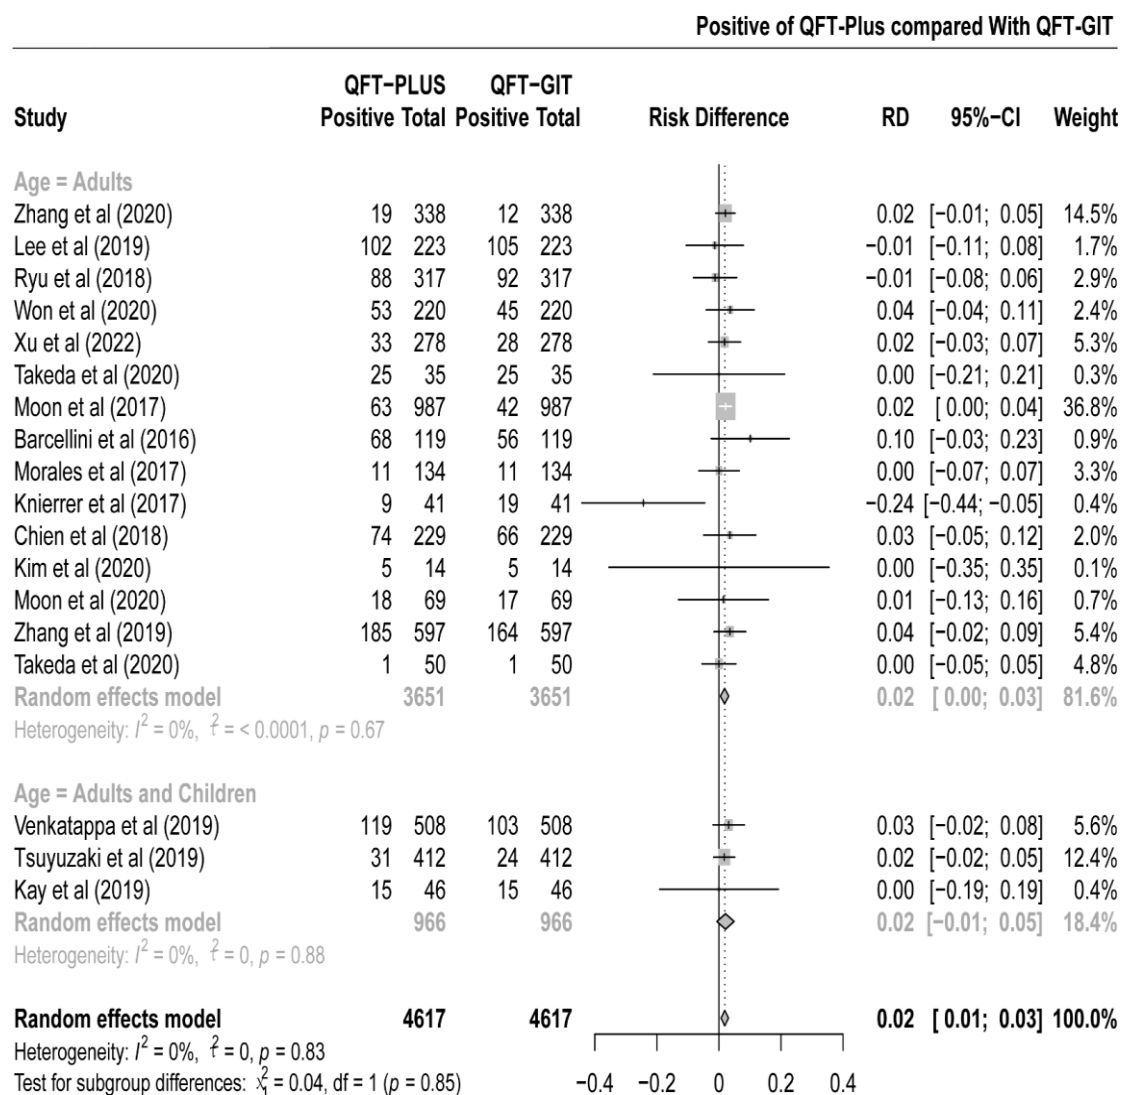

## B.TB burden

### Positive rate of QFT-Plus compared With QFT-GIT

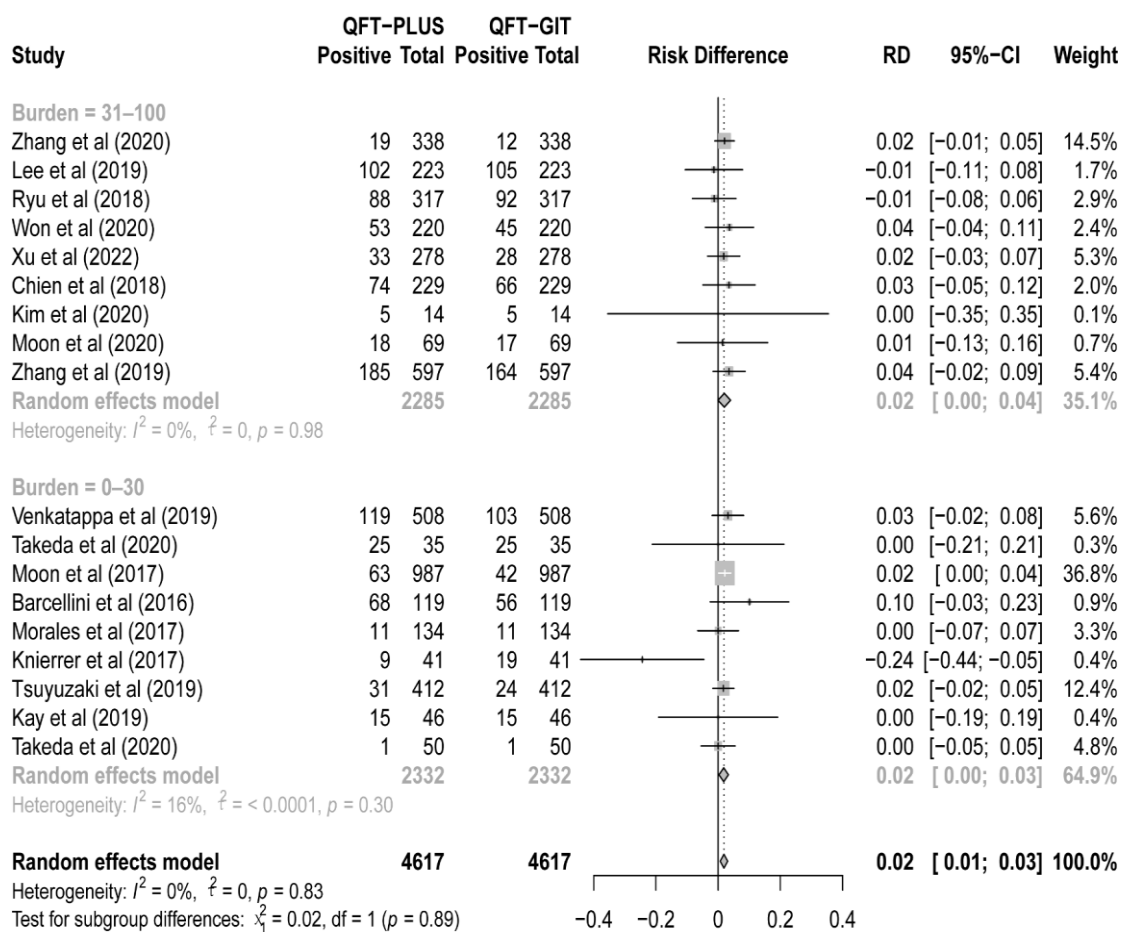

### C. Participant

Positive rate of QFT-Plus compared With QFT-GIT

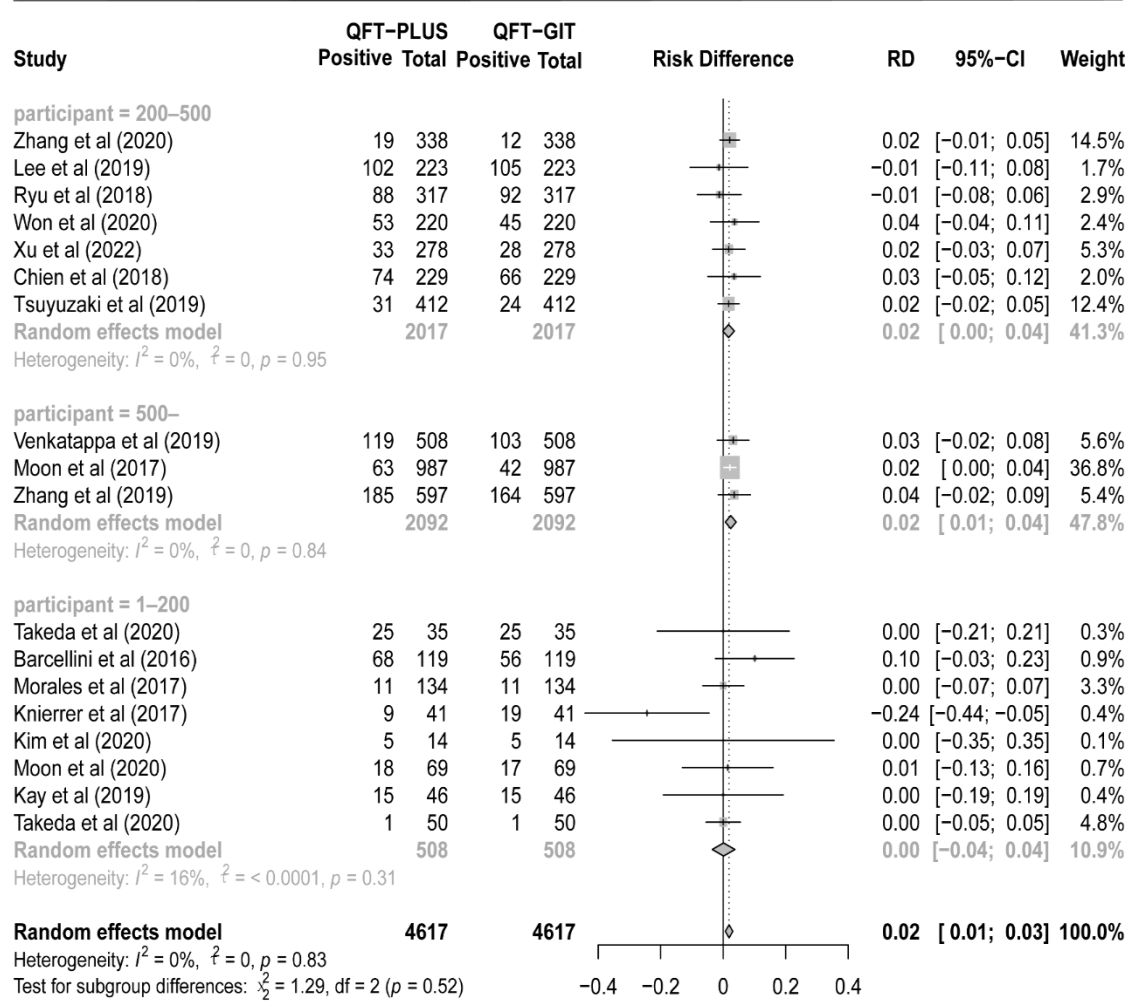

## D. Population

Positive rate of QFT-Plus compared With QFT-GIT

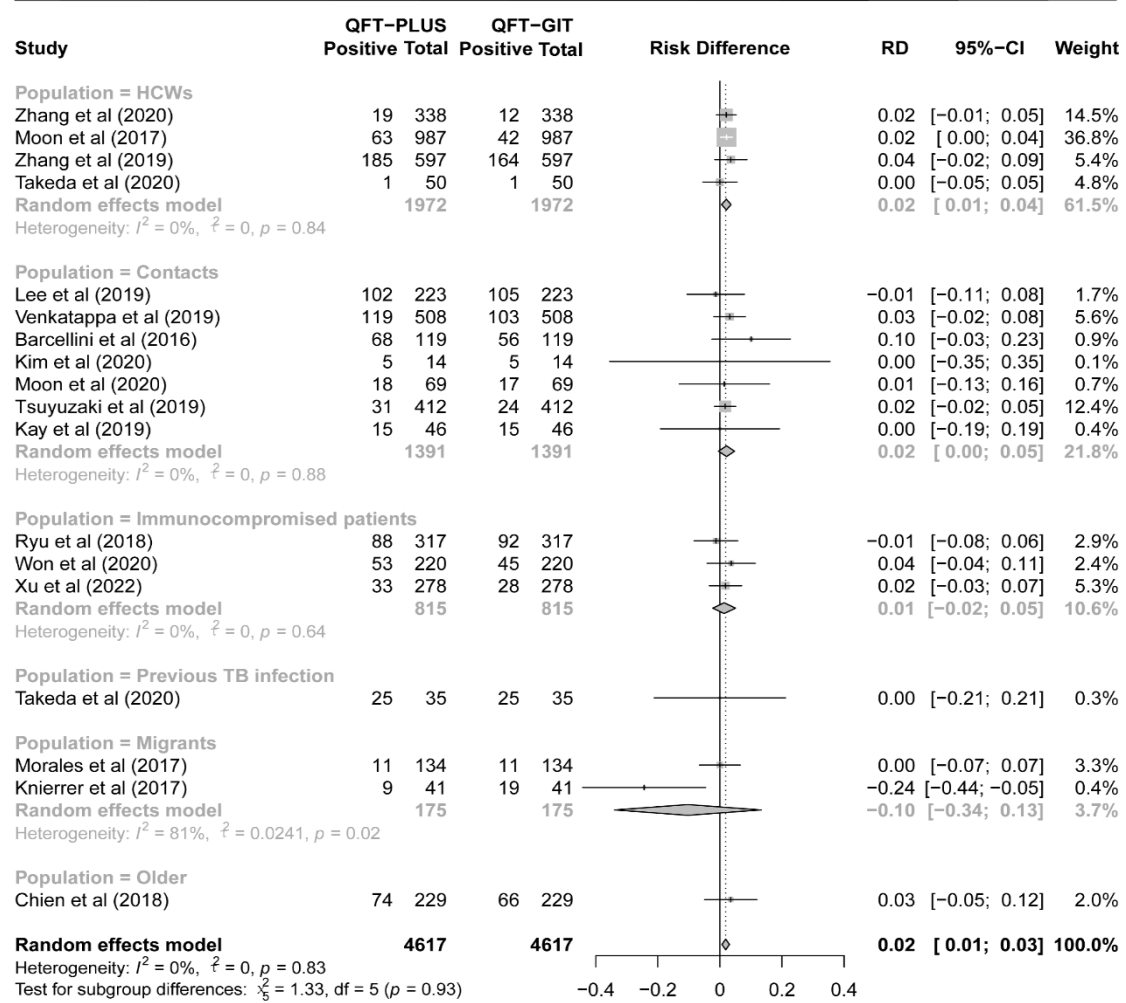

Figure 13: Forest plot of studies estimating the positive rate in high-risk populations for age (A), TB burden (B), participant (C) and population (D) subgroup analysis of QFT-PLUS compared with T-SPOT.TB.

### A. Age

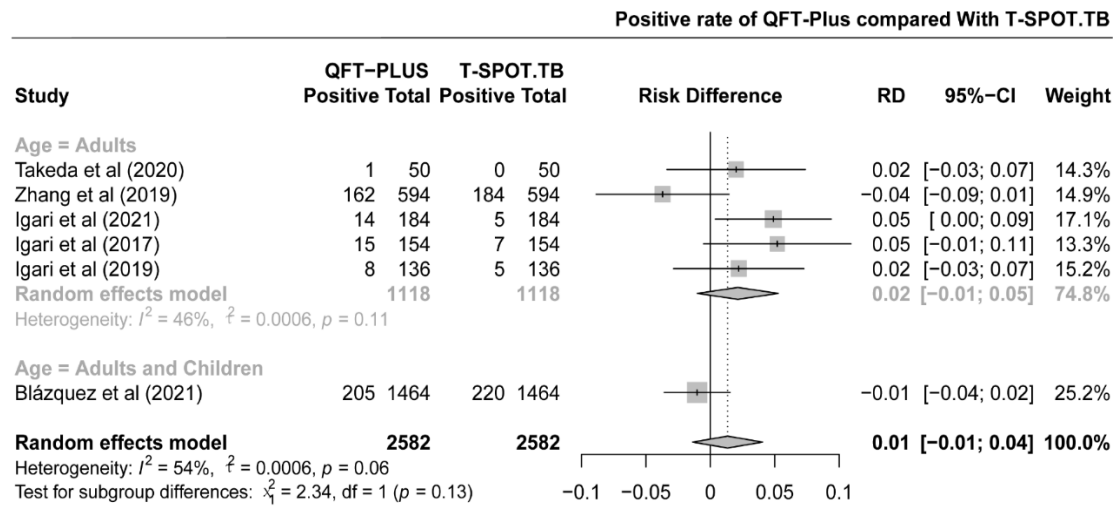

### B. TB burden

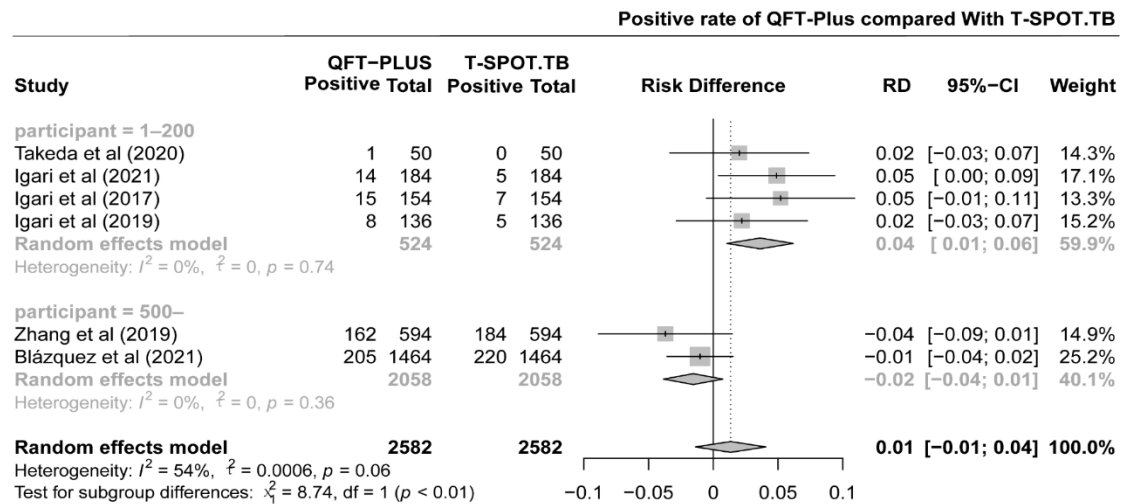

### C. Participant

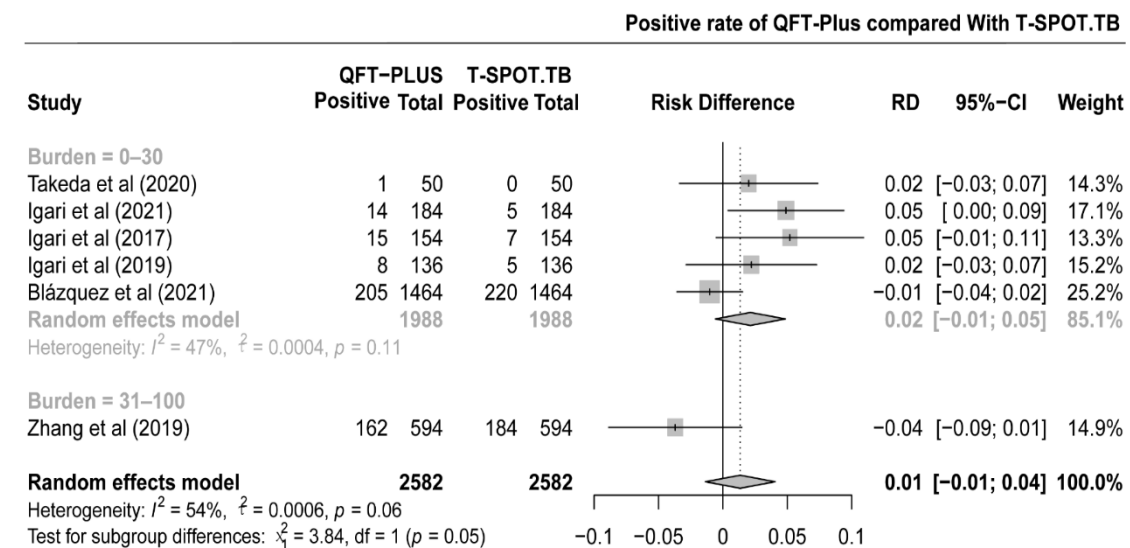

## D. Population

Positive rate of QFT-Plus compared With T-SPOT.TB

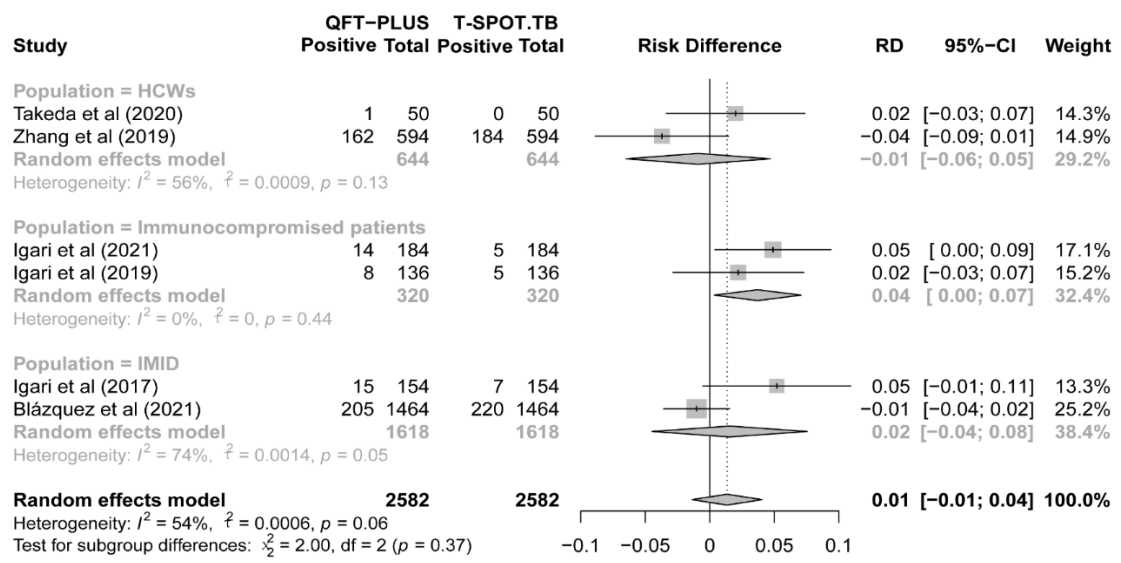

Figure 14: Forest plot of studies estimating the positive rate in high-risk populations for age (A), TB burden (B), participant (C) and population (D) subgroup analysis of QFT-PLUS compared with TST.

### A. Age

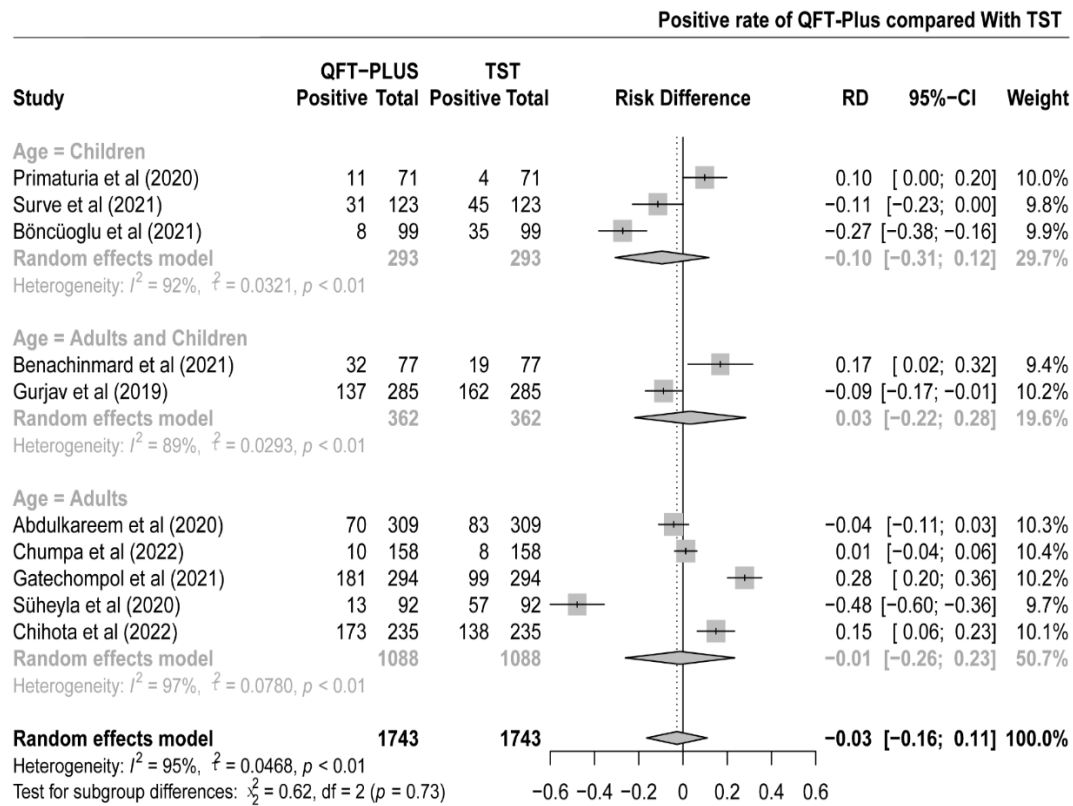

### B. TB burden

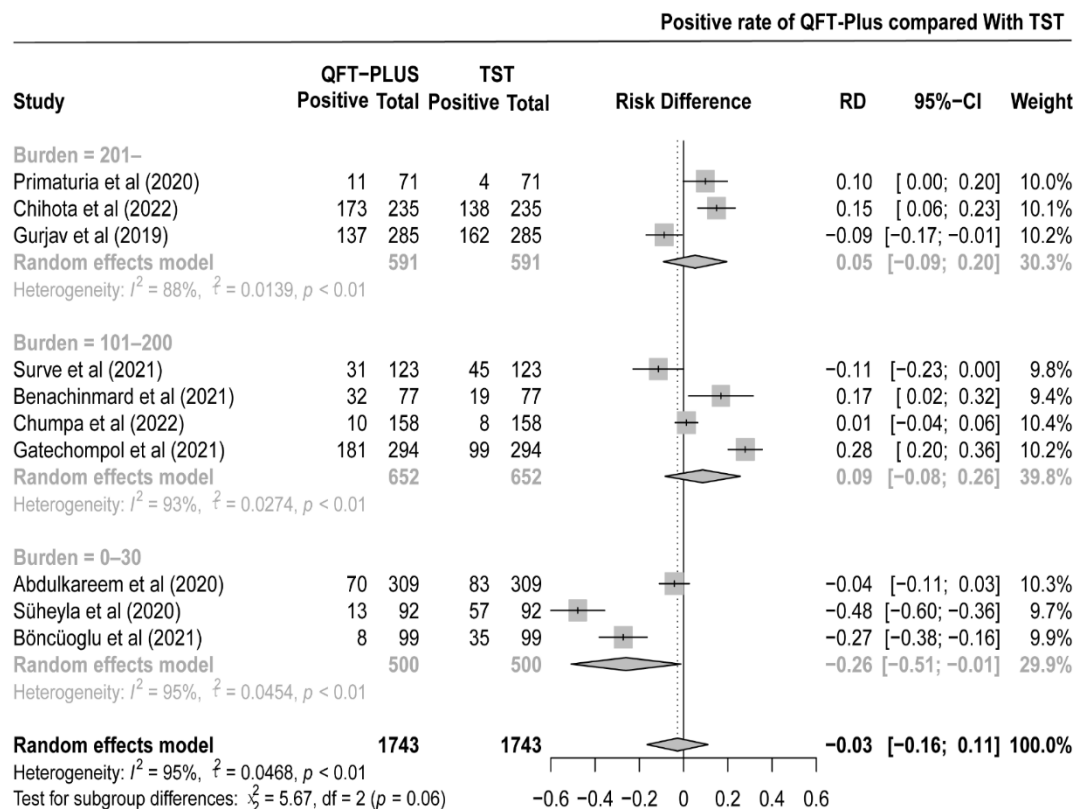

### C. Participant

Positive rate of QFT-Plus compared With TST

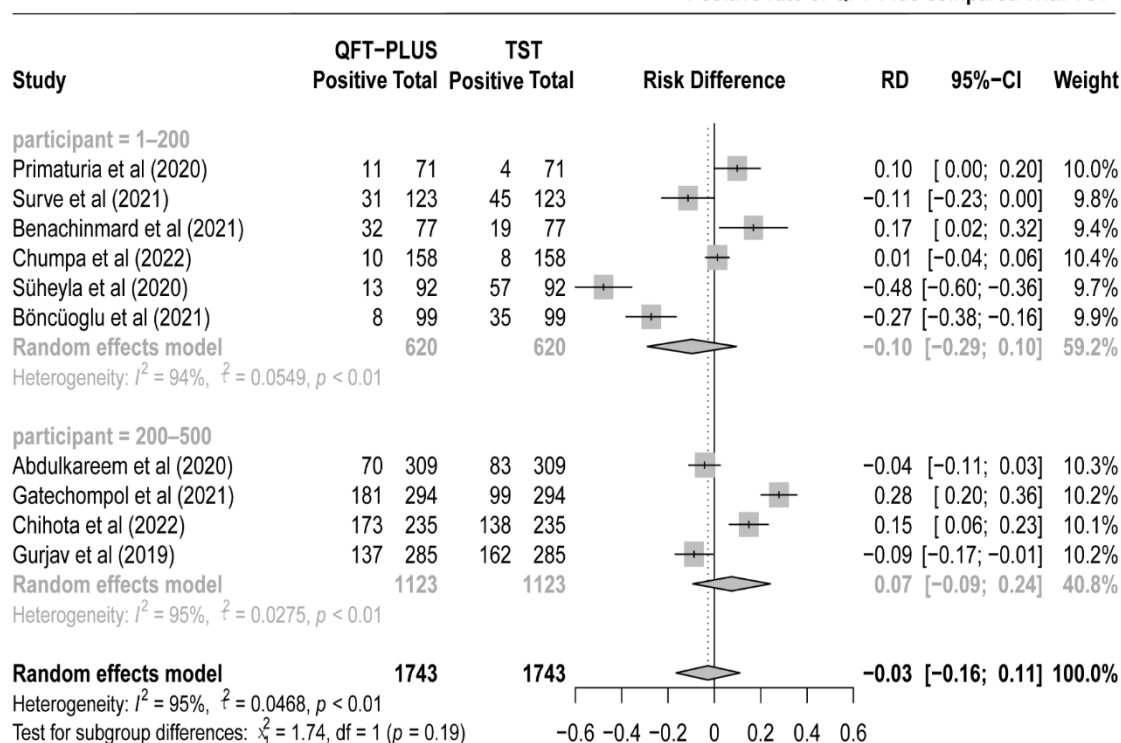

### D. Population

Positive rate of QFT-Plus compared With TST

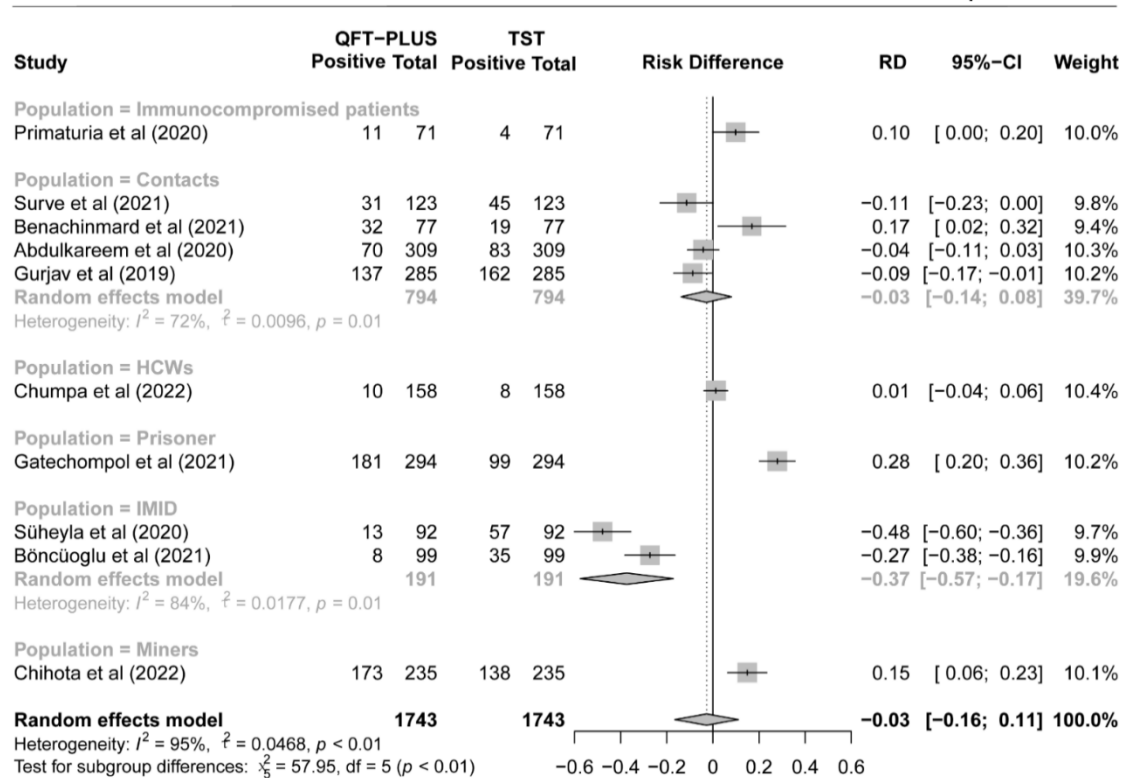

Figure 15: Sensitivity analysis of QFT-PLUS compared to QFT-GIT (A) and T-SPOT.TB (B) in patients with active TB

### A.QFT-GIT

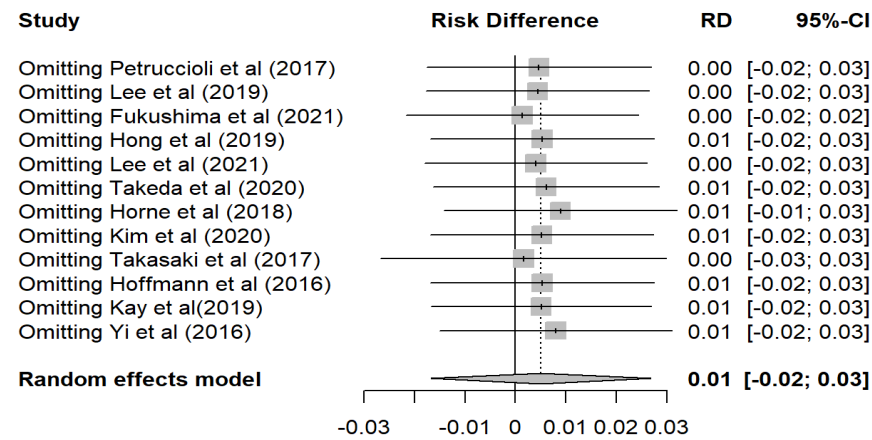

### B.T-SPOT.TB

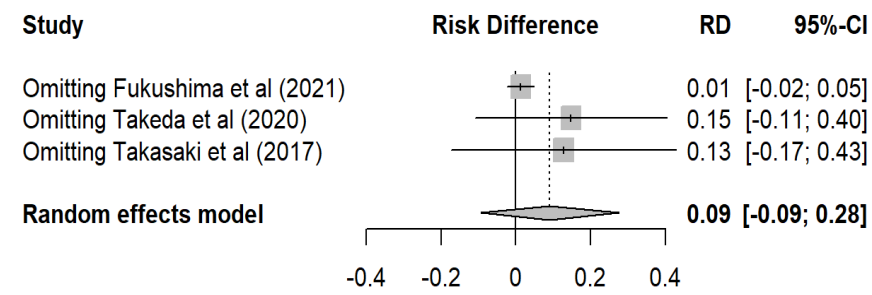

Figure 16: Sensitivity analysis of QFT-PLUS compared to QFT-GIT (A), T-SPOT.TB (B) and TST(C) in populations with very low risk of TB exposure

**A.QFT-GIT**

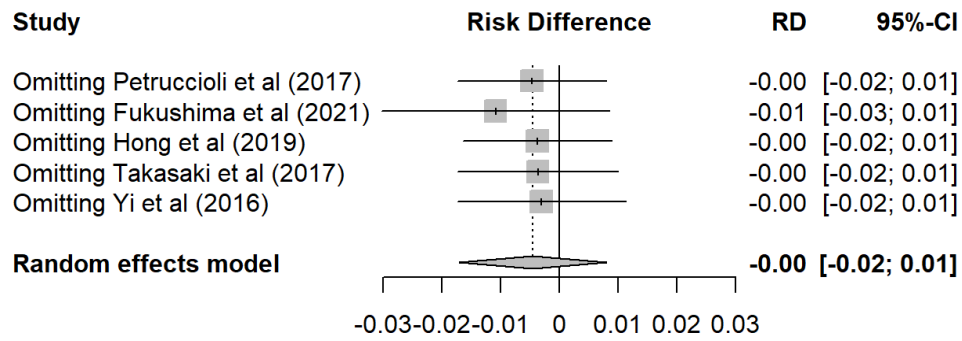

**B.T-SPOT.TB**

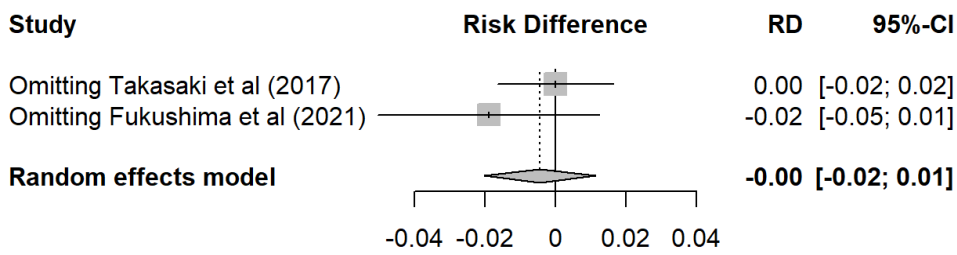

**C.TST**

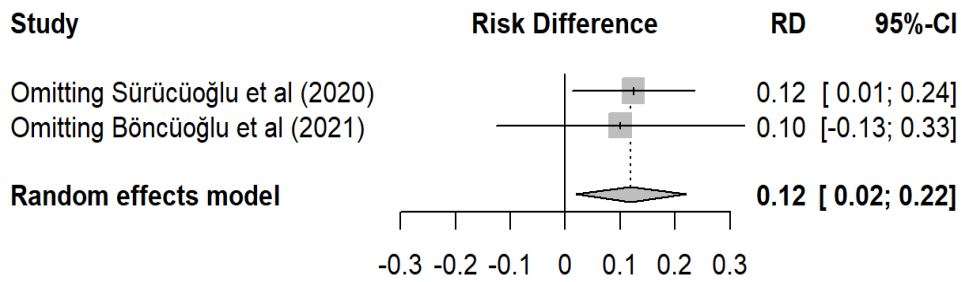

Figure 17: Sensitivity analysis of QFT-PLUS compared to QFT-GIT (A), T-SPOT.TB (B) and TST(C) in high-risk populations

### A.QFT-GIT

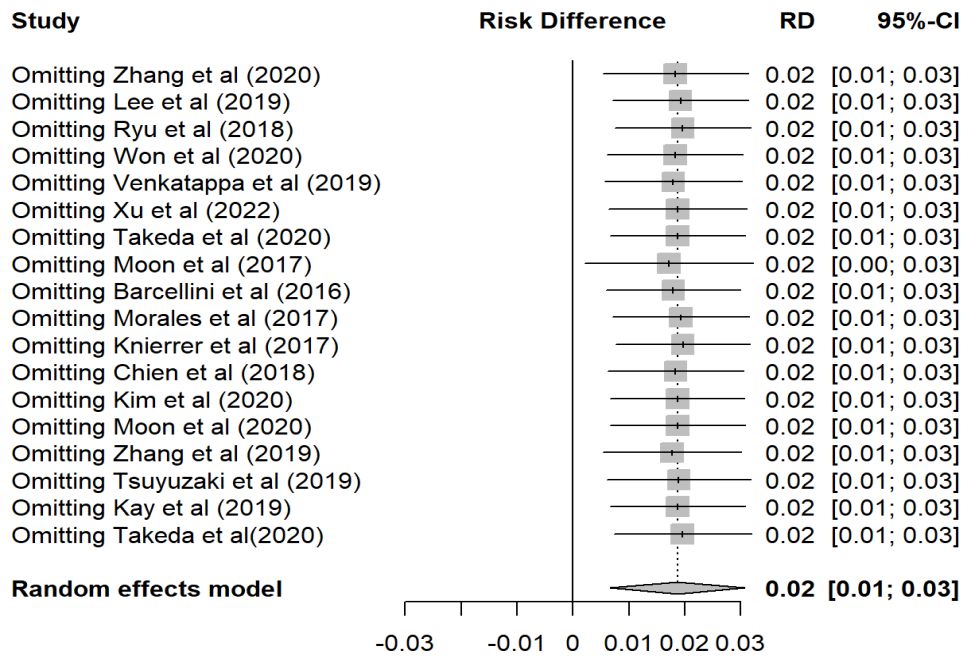

### B.T-SPOT.TB

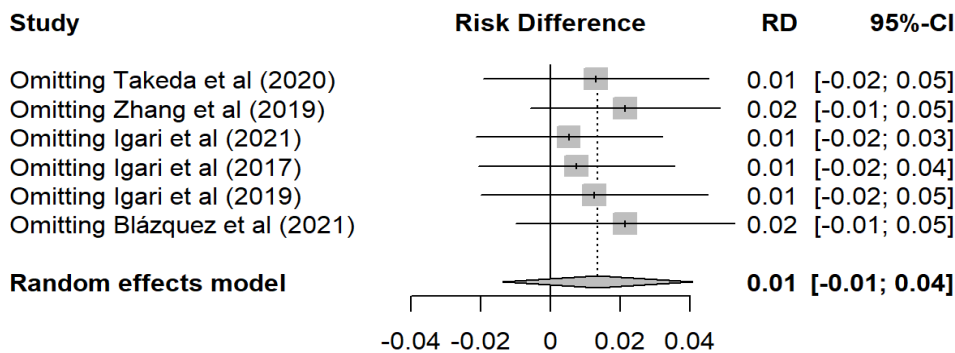

### C.TST

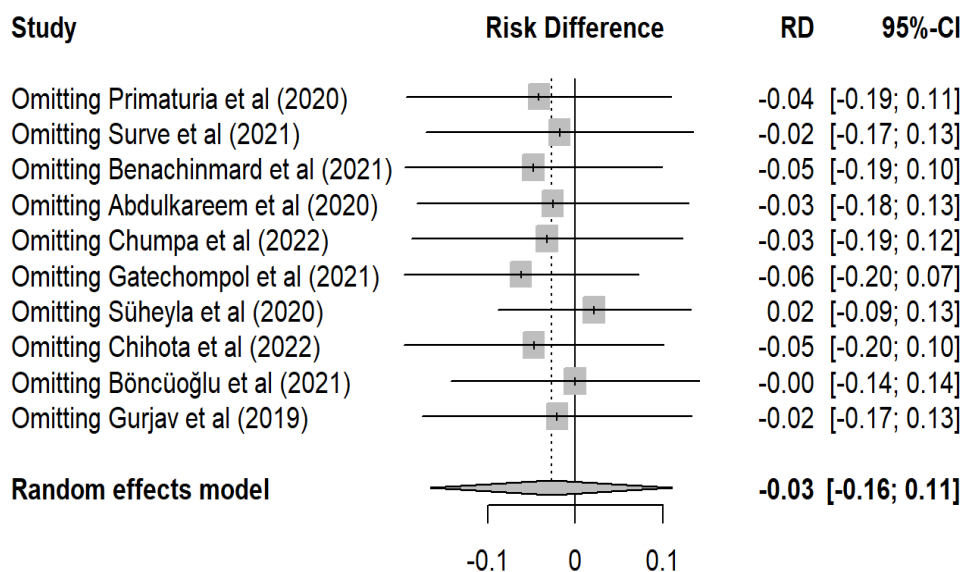

Figure 18: Funnel plot of QFT-PLUS compared to QFT-GIT (A) and T-SPOT.TB (B) in patients with active TB

A.QFT-GIT

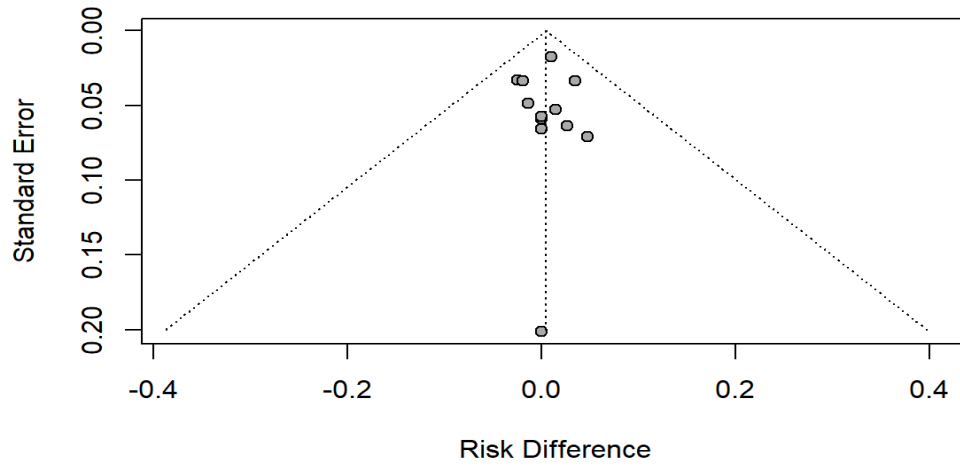

B.T-SPOT.TB

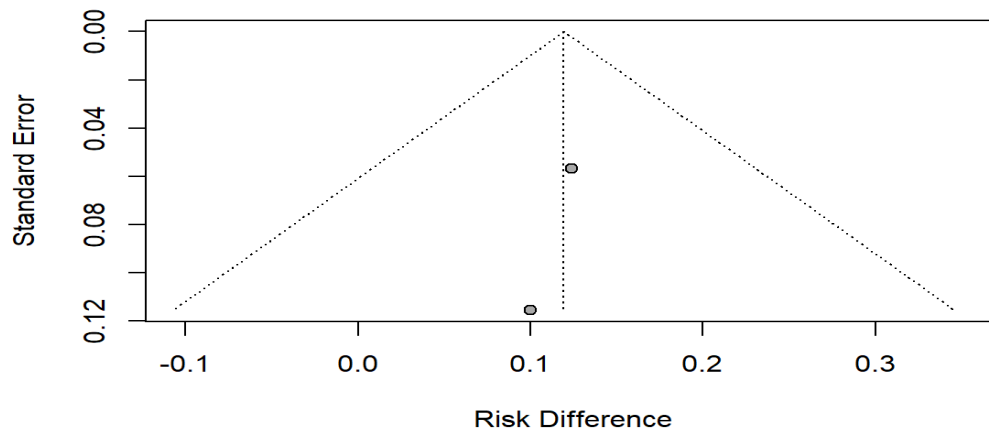

Figure 19: Funnel plot of QFT-PLUS compared to QFT-GIT (A), T-SPOT.TB (B) and TST(C) in populations with very low risk of TB exposure

A.QFT-GIT

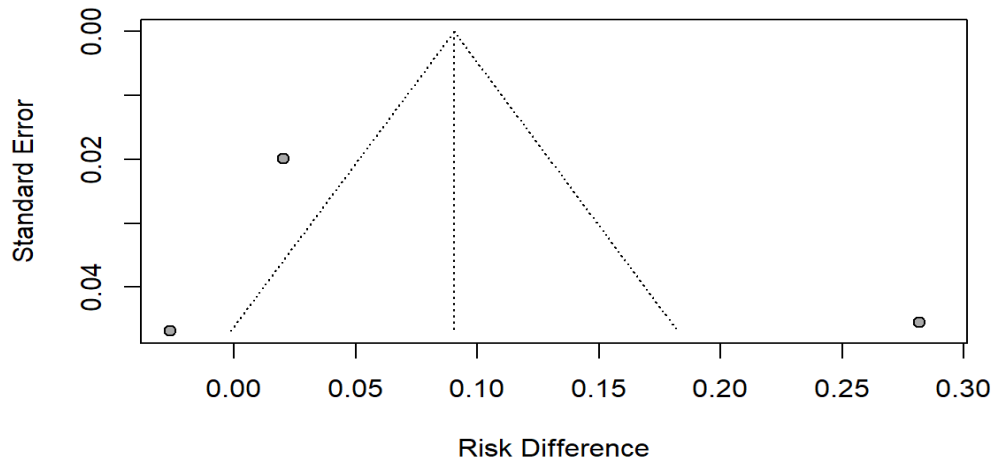

B.T-SPOT.TB

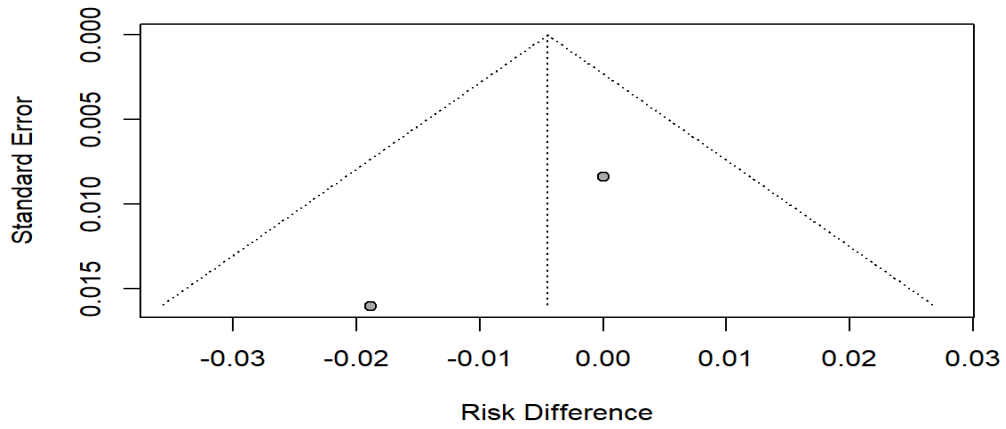

C.TST

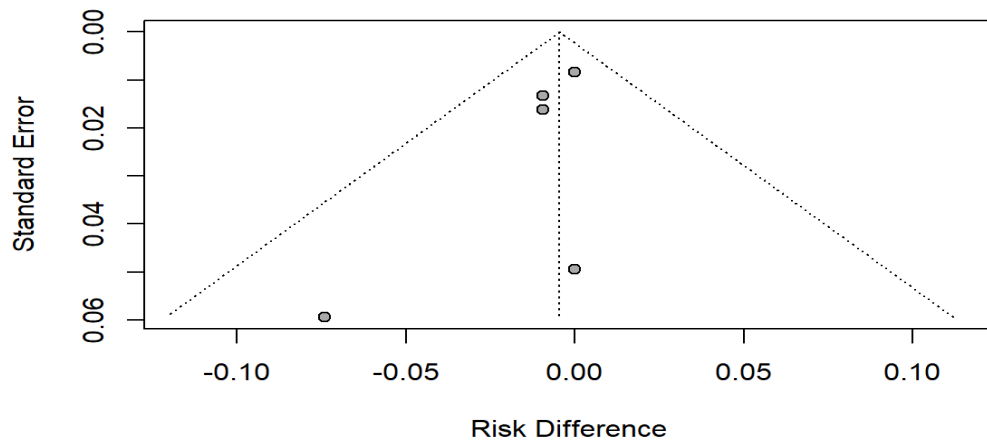

Figure 20: Funnel plot of QFT-PLUS compared to QFT-GIT (A), T-SPOT.TB (B) and TST(C) in high-risk populations

A.QFT-GIT

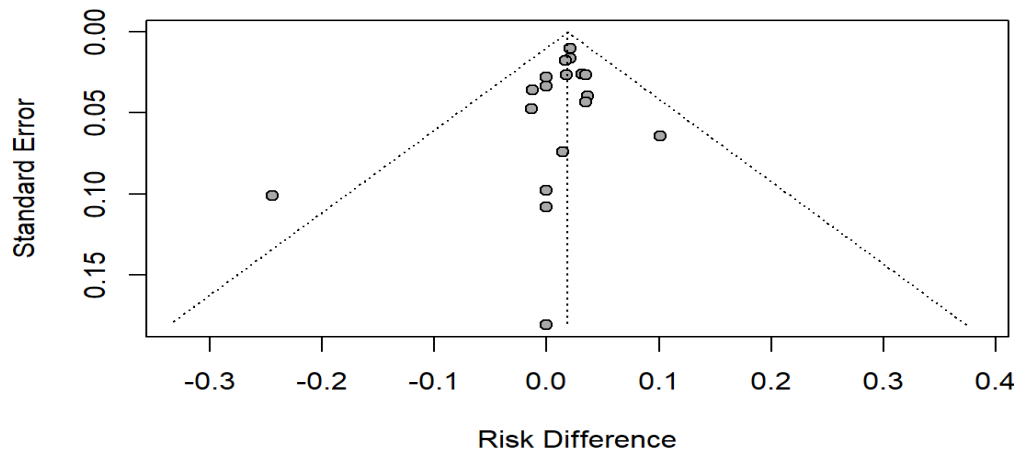

B.T-SPOT.TB

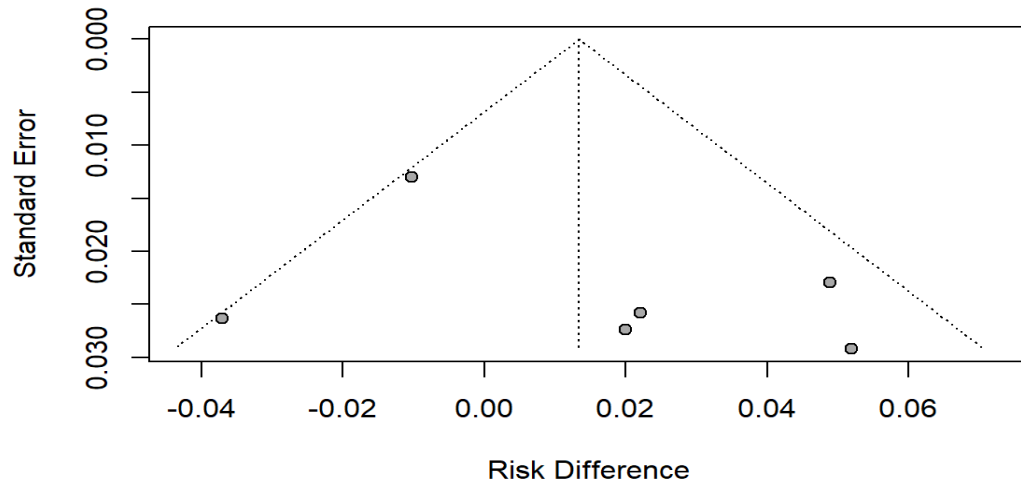

C. TST

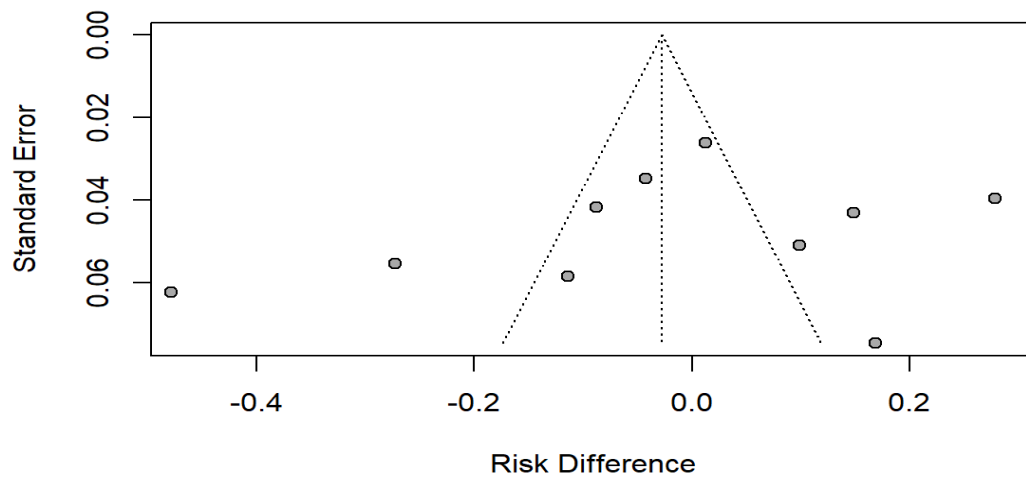

Supplement: Supplementary file 1 [file f6e27ef6108f9e4a299df392.pdf]
